1 **Asian wild apples threatened by gene flow from domesticated apples and by**  
2 **their pestified pathogen**

3 Alice Feurtey<sup>1,2,a</sup>, Ellen Guitton<sup>3,a</sup>, Marie De Gracia Coquerel<sup>3</sup>, Ludovic Duvaux<sup>3,4</sup>, Jason  
4 Shiller<sup>3,5</sup>, Marie-Noëlle Bellanger<sup>3</sup>, Pascale Expert<sup>3</sup>, Mélanie Sannier<sup>3</sup>, Valérie Caffier<sup>3</sup>,  
5 Tatiana Giraud<sup>1</sup>, Bruno Le Cam<sup>3</sup> and Christophe Lemaire<sup>3\*</sup>

6 <sup>1</sup> Ecologie Systématique Evolution, CNRS, AgroParisTech, Université Paris-Saclay, 91400  
7 Orsay, France

8 <sup>2</sup> Max Planck Institute for Evolutionary Biology, 24306 Plön, Germany

9 <sup>3</sup> IRHS-UMR1345, Université d'Angers, INRAE, Institut Agro, SFR 4207 QuaSaV, 49071,  
10 Beaucouzé, France

11 <sup>4</sup> BIOGECO, INRAE, Université de Bordeaux, 33610 Cestas, France

12 <sup>5</sup> Noble Research Institute, Ardmore, OK 73401, USA

13 <sup>a</sup> Alice Feurtey and Ellen Guitton should be considered joint first author

14 \* Correspondence : Dr. Christophe Lemaire. IRHS, 42 rue G. Morel. 49071 Beaucouzé  
15 Cedex, France.

16 Tel : +33 2 41 22 57 27

17 E-mail: [christophe.lemaire@univ-angers.fr](mailto:christophe.lemaire@univ-angers.fr)

18

19

20 **Abstract**

21 Massive gene flow between crops and their wild relatives may threaten the genetic integrity of  
22 wild species. Such threats are now well documented, but little is known about indirect  
23 consequences involving the spillover of crop pathogens to wild plants or introgression  
24 between crop and wild pathogens. To address these questions, we used population genetics  
25 approaches, demographic inference and pathogenicity tests on host-pathogen pairs composed  
26 of wild or domesticated apple trees of Central Asia and their fungal pathogen, *Venturia*  
27 *inaequalis*, itself showing differentiated agricultural-type and wild-type populations. We  
28 confirmed the occurrence of gene flow from cultivated to wild apple trees in Asian forests,  
29 threatening the Asian wild apple genetic integrity. SNP markers and demographic modeling  
30 revealed the occurrence of a secondary contact followed by hybridization between  
31 agricultural-type and wild-type fungal pathogen populations, and the dispersal of the  
32 agricultural-type pathogen in wild forests. We detected a SNP predicting the ability of the  
33 fungus to parasitize the different host populations, which induced an early stop codon in a  
34 gene coding for a small secreted protein in the agricultural-type fungal population, thus  
35 representing a putative avirulence gene which function loss would enable to parasitize  
36 cultivated apples. Pathogenicity tests in fact revealed the pestification of *V. inaequalis*, with  
37 higher virulence of the agricultural-type population on both wild and domesticated trees. Our  
38 findings highlight the threat posed by cultivating a crop near its center of origin, with the  
39 invasion of a pestified pathogen on wild plants and introgression in the wild-type pathogen.

40 **Keywords:** apple, crop-to-wild gene flow, hybridization, *Malus*, secondary contact,  
41 avirulence gene, *Venturia*

42



## 44 **Introduction**

45 The domestication of plants corresponds to genetic and phenotypic differentiation between  
46 crops and their wild relatives under human selection (Zeder, Emshwiller, Smith & Bradley,  
47 2006). However, crops and their wild relatives often remain interfertile, which can lead to  
48 introgression when the two taxa remain geographically close or come into secondary contact  
49 (Ellstrand et al., 2013). The hybrids resulting from crop-to-wild pollination events may have a  
50 low fitness in natural environments (Wang, Viera, Crawford, Chu & Nielsen., 2017),  
51 potentially driving to extinction the wild lineages receiving massive gene flow from its  
52 relative crop (Todesco et al., 2016; Wolf, Takebayashi & Rieseberg, 2001). In contrast,  
53 hybrids can outcompete pure wild individuals, thus threatening the genetic integrity of wild  
54 lineages (Feurtey, Cornille, Shykoff, Snirc & Giraud, 2017; Hooftman, Jong, Oostermeijer &  
55 Den Nijs, 2007; Hovick, Campbell, Snow & Whitney, 2012), thereby jeopardizing future  
56 adaptation to global changes and leading to a loss of valuable genetic resources for breeding  
57 programs.

58 A much less widely studied, but just as alarming, consequence of secondary contact between  
59 crops and their wild relatives, is the possible gene flow between their respective pathogens,  
60 which are themselves often closely related. Such gene flow between differentiated pathogen  
61 populations or species parasitizing wild and domesticated hosts can promote the emergence of  
62 new diseases or the breakdown of resistance, through the generation of pathogens with an  
63 expanded host range (Depotter, Seidl, Wood & Thomma, 2016), higher resistance to  
64 antibiotics (Hanage, Fraser, Tang, Connor & Corander, 2009) or enhanced virulence (i.e.  
65 degree of damage caused by the pathogen to its host) (Stukenbrock, Christiansen, Hansen,  
66 Dutheil & Schierup, 2012), thus potentially representing a major threat to both crop health

67 and wild host persistence (Lemaire et al., 2016; Leroy, Lemaire, Dunemann & Le Cam, 2013;  
68 Leroy et al., 2016). Pathogen spillover (*i.e.*, infection by a pathogen on another host than its  
69 endemic host) and hybridization between closely related phytopathogenic fungal species  
70 following secondary contact have been reported in several systems (Feurtey & Stukenbrock,  
71 2018; Gladieux et al., 2011; Stukenbrock, 2016 a, b). Indeed, when fungal populations have  
72 diverged in allopatry and have specialized on new hosts and later met in sympatry (*i.e.*,  
73 secondary contact), pre-mating barriers are often weak (Giraud, Refrégier, Le Gac, de Vienne  
74 & Hood, 2008; Le Gac & Giraud, 2008) and they can hybridize and/or still infect their  
75 ancestral host. The resulting spillover and hybridization events can lead to disease emergence  
76 and/or increased disease severity (Ioos, Andrieux, Marçais & Frey, 2006; Lin et al., 2007;  
77 Newcombe, Stirling, McDonald & Bradshaw, 2000; Stukenbrock et al., 2012). In anther-smut  
78 *Microbotryum* fungi for example, two sister castrating pathogens parasitize two sister plant  
79 species and co-occur in sympatry as a consequence of a secondary contact following  
80 allopatric divergence (Gladieux et al., 2011). One of the two species, *Microbotryum lychnidis-*  
81 *dioicae* (DC. ex Liro, Deml & Oberw.), is however better at infecting both hosts, and  
82 spillovers occur in nature (de Vienne, Hood & Giraud, 2009; Gladieux et al., 2011). In  
83 poplars, hybrid trees were generated and planted as they were resistant to the two rust species  
84 parasitizing the two parental tree species. However, a fungal hybrid between the two rust  
85 species rapidly emerged that was able to cause disease on the hybrid poplars (Newcombe et  
86 al., 2000). Yet, the consequences of crop-to-wild gene flow on the evolution of wild pathogen  
87 populations and on the disease of their wild host has been little investigated. Joint analyses of  
88 both wild and agricultural hosts and pathogens are required for a comprehensive  
89 understanding of the consequences of secondary contacts of crops and their wild relatives, and  
90 of their pathogens, as well as for elucidating coevolutionary histories and local adaptation.

91 Yet, such studies combining both host and pathogen population genetic analyses remain  
92 scarce (Croll and Laine 2016).

93 Here, we addressed these questions on apple trees and their apple scab fungal pathogen,  
94 *Venturia inaequalis* (Cooke) G. Winter, which represent good models for investigating the  
95 consequences of secondary contact between crops and their wild relatives. They indeed have  
96 both wild and agricultural differentiated species/populations that have recently been reunified  
97 in their center of origin and may thus possibly hybridize (Figure 1). The cultivated apple  
98 (*Malus domestica* Borkh.) is the most cultivated fruit tree of temperate areas worldwide (FAO  
99 STATS from 2008-2018, as accessed on 04-07-2020). Analysis of phenotypic diversity,  
100 genetic markers, archeological data and demographic inference showed that the cultivated  
101 apple was initially domesticated from *M. sieversii* Ledeb. M. Roem (Figure 1A), forming  
102 quasi-monospecific natural forests of wild apple in the Tian Shan Mountains in Central Asia  
103 (Cornille et al., 2012; Harris, Robinson & Juniper, 2002; Vavilov, 1931; Velasco et al., 2010  
104 ), which have been declared a World Heritage Center by UNESCO. The cultivated apple was  
105 imported into Europe by the Romans *via* the Caucasian and Mediterranean coasts, crossing  
106 the distribution ranges of various wild apple tree species on the way, leading to major  
107 secondary contributions to the cultivated apple tree genepool from several crabapples  
108 (Cornille et al., 2012; Cornille, Gladieux & Giraud 2013; Nikiforova, Cavalieri, Velasco &  
109 Goremykin, 2013). There has been in particular, in Western Europe, an important contribution  
110 from the European crabapple, *M. sylvestris* (L.) Mill, to the *M. domestica* genome (Figure  
111 1A). Domestication and breeding has led to high differentiation between *M. domestica* and its  
112 various wild progenitors (Cornille et al., 2012). However, because apple species generally  
113 have weak interspecific barriers, introgression can still occur between wild and cultivated

114 forms (Cornille et al., 2012; Nikiforova et al., 2013). This situation raises serious concerns  
115 regarding possible gene flow and its deleterious consequences for the conservation of  
116 important wild genetic resources. Yet, most studies on gene flow between domesticated and  
117 wild apples have focused on the European wild apple tree. These studies have shown that  
118 extensive crop-to-wild gene flow is threatening the genetic integrity of the European  
119 crabapple *M. sylvestris* (Cornille et al., 2015; Feurtey et al. 2017; Figure 1A). In Central Asia,  
120 at the end of the 19th century, western European *M. domestica* apple varieties have been  
121 planted in orchards close to *M. sieversii* forests, leading to recent secondary contact between  
122 *M. domestica* and *M. sieversii*. A couple of studies have suggested the occurrence of gene  
123 flow from *M. domestica* to the Asian crabapple *M. sieversii*, although without investigating  
124 the contact sites that orchards represent (Cornille et al. 2012; Omasheva et al., 2017). Such  
125 gene flow may affect the genetic integrity of *M. sieversii*, which would amplify the current  
126 threat on Asian wild-apple forest ecosystems, which are already endangered by forest  
127 destruction, *M. sieversii* being included in the International Union for Conservation of  
128 Nature's Red List of Threatened Species (IUCN Red List) as a vulnerable organism.

129 Apple domestication has also fostered divergence in the ascomycete fungus *V. inaequalis*, a  
130 haploid fungus with an obligatory sexual reproduction event each year. This fungus is  
131 responsible for the apple scab disease, producing gray-brown lesions on leaves and fruits, and  
132 leading to major economic losses on cultivated apples. *Venturia inaequalis* parasitizes *M.*  
133 *domestica* and several wild apple tree species, such as *M. sieversii*, *M. sylvestris* and *M.*  
134 *floribunda* (Siebold ex Van Houtte), and differentiated populations occur on these different  
135 *Malus* species (Figure 1B; Gladieux et al., 2010b). Apple trees and *V. inaequalis* share a  
136 common geographical origin in Central Asia (Cornille et al., 2012; Gladieux et al., 2008), *M.*

137 *sieversii* being the wild host of origin of the fungus (Gladieux et al., 2010b). In the Central  
138 Asian Mountains, in forests where *M. domestica* is absent, a wild-type *V. inaequalis*  
139 population that represents a relic of the ancestral population has been found on *M. sieversii*  
140 trees (Gladieux et al., 2010b). An agricultural-type *V. inaequalis* population has been found in  
141 Central Asia (Gladieux et al., 2010b) in the peri-urban or agricultural environments on *M.*  
142 *domestica* and on *M. sieversii* (Figure 1B). These wild-type and agricultural-type populations  
143 of *V. inaequalis* began diverging in Central Asia between 2,000 and 4,000 years ago  
144 (Gladieux et al., 2010b), the agricultural-type population having then spread into Europe  
145 together with the domesticated apple (Figure 1B; Gladieux et al., 2010b). It has not been  
146 studied yet whether the current co-occurrence of the agricultural-type and wild-type *V.*  
147 *inaequalis* populations represents a secondary contact between the two fungal populations,  
148 and what are its epidemiological consequences through potential spillover and introgressions  
149 (Wang et al., 2017). Indeed, gene flow between wild-type and agricultural-type *V. inaequalis*  
150 populations may lead to the emergence of hybrids harboring new epidemiological traits,  
151 potentially harmful to both wild and cultivated apple trees, and/or to the dispersal of the  
152 agricultural-type population into wild forests. As a matter of fact, previous studies have  
153 shown that the *V. inaequalis* population parasitizing *M. floribunda*, and highly differentiated  
154 from all the populations on *M. sieversii* and *M. sylvestris*, migrated to resistant varieties of *M.*  
155 *domestica*, which promoted a resistance breakdown and gene flow between pathogen  
156 populations (Figure 1B; Lemaire et al. 2016; Leroy et al. 2016).

157 Despite the importance of wild Asian apple trees as an endangered wild species and as a  
158 valuable genetic resource for future breeding programs, the potential impacts of the secondary  
159 contact between domesticated and wild apple trees in Central Asia on the fitness of both the



160 plant and its associated pathogen have not been investigated yet. The lack of diagnostic  
161 morphological features for apple species makes the use of genetic markers necessary for  
162 species and hybrid identification (Cornille, Giraud, Smulders, Roldán-Ruiz & Gladioux,  
163 2014). We therefore used microsatellite markers in apple trees and genome-wide single-  
164 nucleotide polymorphisms (SNPs) in *V. inaequalis*, together with pathogenicity assays, to  
165 assess the occurrence and impact of secondary contact on both fruit trees and their fungal  
166 pathogens in their center of diversity. First, we investigated whether the introduction of  
167 domesticated apple trees in Central Asia threatened the genetic integrity of *M. sieversii* wild  
168 apple trees via introgressions, and whether orchards planted in forests represent particular  
169 threats. We then assessed whether the agricultural-type fungal population occurred on wild  
170 apple trees and hybridized with the wild-type population. We tested, using demographic  
171 modeling and scenarios comparison, the hypothesis that the co-occurrence and hybridization  
172 of agricultural-type and wild-type *V. inaequalis* populations resulted from a secondary contact  
173 at the time when domesticated trees were introduced in orchards near wild apple forests, after  
174 a period of allopatry. We also tested whether some genomic regions in *V. inaequalis* were  
175 good predictors of its ability to parasitize the different host populations. Finally, we tested,  
176 using experimental inoculations, whether such gene flow increased the threats to the wild  
177 apple tree through increase in virulence of the pathogen populations.

178

## 179 **Material and Methods**

### 180 **Sampling**

181 Plant and fungal materials were sampled in 2012 at nine sites in Kazakhstan in the Tian Shan  
182 Mountains, the origin center of the apple tree domestication where the natural forest is

183 dominated by wild apple trees (Cornille et al., 2014). Seven of the nine sampling sites were  
184 located in natural apple forests, farther than dozens of kilometers from any orchard. The two  
185 remaining sampling sites corresponded to a 20-30 year-old orchard and the wild natural forest  
186 immediately surrounding the orchard, respectively. We sampled apple trees in the orchard site  
187 and wild apple trees in the surrounding forest. This orchard was situated directly in the middle  
188 of the natural forest and constituted a rare situation allowing to investigate the consequences  
189 of the secondary contact for both the host and the pathogen. We obtained plant material from  
190 245 apple trees, originating from the nine sites. The 245 plant samples corresponded to 185  
191 leaves and 60 fruit skin pieces, all harbouring visible scab lesions (Table S1). No  
192 morphological differences between *M. domestica* and *M. sieversii* allow to distinguish them  
193 reliably in the field. Therefore, all sampled trees were genotyped with 33 microsatellite  
194 markers and were assigned to *M. domestica* or *M. sieversii* species or to a hybrid class using  
195 as references 50 apple genotypes previously characterized as being non-hybrid *M. domestica*  
196 genotypes and 25 apple genotypes previously characterized as being non-hybrid *M. sieversii*  
197 genotypes (Cornille et al., 2012).

198 Monospore isolation of the fungus was performed from disease lesions on 205 of these 245  
199 trees: 24 to 48 h after spreading a spore suspension obtained from the diseased material on a  
200 Petri dish with malt-agar medium, we took a single germinated spore using a needle under a  
201 stereomicroscope for culture on a new Petri dish. We performed one monospore isolation per  
202 tree for 148 trees and two to four monospore isolations per tree for 57 trees. In total, we  
203 obtained 269 strains (Table S1). In addition to the fungal collection sampled for this study, we  
204 included in our final dataset 15 *V. inaequalis* strains previously assigned to the pure wild type  
205 population and 18 *V. inaequalis* strains previously assigned to the agricultural-type population  
206 (Gladieux et al., 2010b). These 33 *V. inaequalis* reference strains whose genomes have been

207 previously sequenced (Le Cam et al., 2019) had been sampled in Kazakhstan on *M. sieversii*,  
208 either from a peri-urban environment near Almaty (43°15000N-76°54000E) or from a natural  
209 forest site in the Tian Shan Mountains (43°13807N-77°16783E). Despite being sampled on  
210 *M. sieversii*, the 18 strains from the peri-urban environment clustered with strains sampled on  
211 domesticated apples in Kazakh orchards, thus belonging to the agricultural type (Gladieux et  
212 al., 2010b) (Figure 1B; Table S2).

213

#### 214 **SNP design and genotyping for the apple scab fungus *Venturia inaequalis***

215 We used the set of single nucleotide polymorphisms (SNPs) previously detected in the  
216 genomes of the 15 wild-type and 18 agricultural-type reference strains (Gladieux et al.,  
217 2010b; Le Cam et al., 2019). SNPs were filtered in order to avoid transposable elements and  
218 AT-rich regions, as well as more than 20% of missing data (Le Cam et al., 2019). After  
219 filtering, the dataset contained 1,210,121 SNPs, with no bias of missing data frequencies  
220 between wild and agricultural populations. In order to identify a set of SNPs distinguishing  
221 agricultural and wild-type *V. inaequalis* strains, we selected 192 SNPs among the 1,210,121  
222 available SNPs as those meeting three requirements: *i*) with moderate ( $F_{ST} = 0.21$ ) to high  
223 ( $F_{ST} = 1$ ) differentiation between wild-type and agricultural-type reference populations  
224 (Figure S1, Table S3), to obtain reasonable statistical power to assign genotypes to wild,  
225 agricultural and hybrid types, *ii*) physically distant enough to ensure lack of linkage  
226 disequilibrium between them (correlation coefficient between markers within population  $r^2 <$   
227 0.1), and *iii*) found in predicted genes (Le Cam et al., 2019).

228 For each monospore strain, DNA was extracted from 30 to 40 mg of mycelium as previously  
229 described (Leroy et al., 2016). The 269 strains were genotyped at the 192 SNP markers (Table

230 S3) using the *KASPAR* method (KBioscience, competitive allele-specific polymerase chain  
231 reaction assay). *KASPAR* genotyping was performed at the *Gentyane* platform (INRA,  
232 Clermont-Ferrand, France) using 10 ng of haploid DNA mixed with the KASP genotyping  
233 master mix (Catalogue number: KBS-1016-017, LGC Genomics, Hoddesdon, UK) and  
234 custom KASP SNP assays (LGC Genomics, Hoddesdon, UK). Only SNPs and individuals  
235 with less than 20% missing data were kept for analyses. After filtering for missing data, the  
236 dataset was composed of 255 fungal strains genotyped for 181 SNPs. Details about SNP  
237 location on the *V. inaequalis* reference genome are given in Table S3.

238

### 239 **Genotyping using microsatellite markers for the host apple tree**

240 In order to assign trees to wild, domesticated and hybrid types, all apple trees were genotyped  
241 using microsatellite markers. Apple tree DNA was extracted from leaves with the NucleoSpin  
242 plant DNA extraction kit II® (Macherey & Nagel). Microsatellite PCR amplifications were  
243 performed with a Multiplex PCR Kit® (QIAGEN, Inc.). To genotype the 245 trees, we used  
244 33 microsatellite markers spread across the 17 chromosomes using 10 different multiplex  
245 reactions, as previously described (Cornille et al., 2012). The genotyping was done at the  
246 *Gentyane* platform (INRA, Clermont-Ferrand, France). Only the microsatellite markers with  
247 less than 30% of missing data were used and only individuals with less than 50% of missing  
248 data were kept for the analyses. The final dataset was thus composed of 240 apple tree  
249 samples genotyped at 28 microsatellite markers.

250 Since fungi were sampled on the genotyped host trees, we had genotypes for host and  
251 pathogen pairs. We obtained genotypes for 249 host-pathogen pairs, several fungal samples  
252 originating from the same trees (132 trees with one fungal strain, 49 trees with two strains,  
253 five trees with three strains and one tree with four strains).

254

## 255 **Analyses of diversity, differentiation and hybridization**

256 Reference genotypes of *M. domestica* (N=50) and *M. sieversii* (N=25) (Cornille et al., 2012)  
257 were used to estimate the proportion of ancestry from these two species in the 240 genotyped  
258 apple trees. We computed a hybrid index (*HI*) implemented in the add-on R-package  
259 *Introgress* (Gompert & Buerkle, 2010), an estimate of the proportion of alleles that were  
260 inherited from one of the two parental populations, *i.e.* the level of ancestry in one of two  
261 populations. In our case, we set pure *M. domestica* trees to *HI*=1 while *M. sieversii* had *HI*=0.  
262 This index therefore represents the proportion of ancestry in the *M. domestica* genepool (thus  
263 called here  $P_{dom}$ ). For the pathogen, we used the same package to compute a hybrid index  
264 based on the reference genotypes of strains previously identified as belonging to the  
265 agricultural-type population (N=18) or to the wild-type (N=15) population (Gladieux et al.,  
266 2010b). Here, we set *HI* = 1 for the agricultural type, so that the hybrid index represents the  
267 proportion of ancestry in the agricultural-type population (here called  $P_{agr}$ ) genepools.

268 In most of our analyses, we used the hybrid indices as continuous values, and not discrete  
269 classes, to avoid potential biases generated by arbitrary thresholds. Only for the analyses of  
270 apple and fungal population or species spatial distribution, of the genetic determinants of  
271 adaptation and of pathogenicity tests, we assigned apple and fungal genotypes to discrete  
272 classes. Apple tree genotypes with a  $P_{dom}$  index below 0.2 and those with a  $P_{dom}$  index greater  
273 than 0.8 were considered to belong to *M. sieversii* and *M. domestica*, respectively, based on  
274 the distribution of the hybrid index (Figure 2A). A fungal strain with a  $P_{agr}$  below 0.1 was  
275 considered to be a wild-type strain, whereas a strain with a  $P_{agr}$  greater than 0.9 was  
276 considered to be an agricultural-type strain, based on the distribution of the hybrid index  
277 (Figure 2B). The threshold was more stringent for fungi than for trees, as more markers were

278 available and the power was, therefore, higher. For both pathogens and hosts, genotypes with  
279 intermediate hybrid index values were considered to be hybrids. Assigning hybrids to more  
280 precise hybrid classes (*ie* F1, F2 or backcrosses) is not possible with the current dataset for  
281 haploid organisms such as *V. inaequalis*. When we used discrete classes for analyses, we  
282 checked that the choice of the thresholds did not affect the inference.

283 For both apple and *V. inaequalis* samples, we also investigated genetic differentiation and  
284 species or genetic lineage assignment through principal component analyses (PCAs) using the  
285 ade4 R package (Dray & Dufour, 2007) based on the multilocus genotypes (microsatellite  
286 markers for trees and SNPs for fungi). We further investigated the existence of population  
287 structure within apple tree species and within the previously delimited *V. inaequalis*  
288 populations using the software STRUCTURE v.4.3 (Falush, Stephens & Pritchard, 2003)  
289 based on 10 runs of 250,000 Monte Carlo Markov Chain (MCMC) iterations after a burn-in of  
290 25,000 iterations using the admixture model and assuming a number of clusters ranging from  
291 1 to 6. The output of STRUCTURE was processed with Clumpp (Jakobsson & Rosenberg,  
292 2007) and we used the method described in Evanno et al. (2005) and implemented in  
293 STRUCTURE HARVESTER (Earl & vonHoldt, 2012) to detect the strongest population  
294 subdivision level. We tested the significance of correlations between the hybrid degrees  
295 inferred from coordinate values of the first PCA axis, the hybrid index and the ancestry  
296 probability given by STRUCTURE using a Pearson's product-moment correlation coefficient  
297 in R.

298 For both apple and *V. inaequalis* populations, we estimated classical population genetics  
299 statistics, *i.e.*, expected heterozygosity ( $H_e$ , Weir & Cockerham, 1984), as well as global and  
300 pairwise differentiation  $F_{ST}$  (Weir & Cockerham, 1984) between the nine sampling sites. All  
301 statistics were computed and tested for significance using GENEPOP v.4.7.5 (Rousset, 2008).

302 Significativity of global and pairwise  $F_{ST}$  was assessed using Fisher's exact tests of allele  
303 frequency differences between sampling sites with 10,000 dememorization and batches and  
304 10,000 iterations per batch. We also performed Mantel tests of correlation (Mantel, 1967)  
305 between pairwise  $F_{ST}$  matrices computed for apple and *V. inaequalis* populations on the one  
306 hand, and between each pairwise  $F_{ST}$  matrix and a matrix of geographical distance between  
307 sampling sites on other hand, using the *mantel.test* function of the ape v5.3 R package  
308 (Paradis & Schliep, 2019).

309

### 310 **Genetic footprints of host adaptation in *Venturia inaequalis***

311 In order to detect genetic signatures of adaptation to host species in *V. inaequalis* populations,  
312 we performed a discriminant analysis on principal components (DAPC; Jombart, Devillard &  
313 Balloux, 2010) implemented in the R package *adegenet v.2.12* (Jombart, 2008). Unlike PCA  
314 which focuses on overall genetic variance, this procedure seeks variables, the discriminant  
315 functions, that maximize differences between *a priori* delimited groups, while minimizing the  
316 variance within these groups. We applied this analysis by defining groups in *V. inaequalis*  
317 based on the assignment of their apple tree groups of collection (*M. domestica*, *M. sieversii*  
318 and hybrids). This approach also aims at detecting the genetic factors (here SNPs) that  
319 contributed the most to this ecologically-based clustering. If one of the 181 SNPs in *V.*  
320 *inaequalis* was closely linked to a genetic variant involved in adaptation to host species, its  
321 loading on the first discriminant functions would indeed be greater than that of other SNPs. In  
322 addition, we estimated monolocus pairwise  $F_{ST}$  between the three host-based fungal clusters,  
323 using Genepop v4.7.5 (Rousset, 2008).

324 To assess what allele was ancestral or derived at the SNP found to predict the host species of  
325 collection, we used five available genomes (Le Cam et al., 2019) belonging to the outgroup *V.*  
326 *inaequalis* lineage parasitising *Pyracantha* (Gladieux, Caffier, Devaux & Le Cam, 2010a; Le  
327 Cam, Parisi & Arene, 2002), with the following NCBI accession numbers SAMN07816619,  
328 SAMN07816620, SAMN07816621, SAMN07816617, SAMN07816618, corresponding to the  
329 strains 186, 1669, 2266, 2269 and 2507 respectively (Le Cam et al., 2019).

330

### 331 **Pathogenicity tests of *V. inaequalis* on *M. domestica* and *M. sieversii***

332 In order to test for an effect of the agricultural, hybrid or wild-type status of *V. inaequalis*  
333 strains on their pathogenicity on *M. domestica* and *M. sieversii*, we performed artificial  
334 inoculations using 57 strains from our sampling, corresponding to 20 strains identified as  
335 agricultural-type, 17 strains identified as wild-type and 20 hybrid strains (Table S1). We used  
336 one variety of *M. domestica* (GALA<sup>®</sup>, X4712) and one accession of *M. sieversii* (GMAL  
337 3619.b) for the pathogenicity tests. Gala is a variety planted worldwide despite being highly  
338 susceptible to apple scab. GMAL 3619.b has been collected from the Tarbagatai mountain  
339 range by American apple breeders (Forsline, Aldwinckle, Dickson, Luby & Hokanson, 2003)  
340 and then introduced in France. We grafted the plants on the rootstock MM106 to obtain a  
341 vigorous growth favorable to disease development and we inoculated *V. inaequalis* strains  
342 when the plants were actively growing. Prior to inoculation, grafted plants were transferred to  
343 a quarantine-controlled climatic chamber. Because of the Asian origin of the strains, we used  
344 a quarantine chamber to prevent the risk of pathogen escape. Due to the lack of space in  
345 climatic chambers, we had to perform experiments at two different dates. In the first  
346 experiment, we used 10 agricultural-type strains, 10 hybrids and 8 wild-type strains. In the



347 second experiment, we used 10 agricultural-type strains, 10 hybrids and 9 wild-type strains. In  
348 addition, for normalizing the two experiments, six strains (two strains of each type) that were  
349 used in the first experiment were also included in the second experiment and used as  
350 calibration strains in the analysis.

351 Each strain of *V. inaequalis* was grown on a cellophane sheet placed on malt-agar medium at  
352 17°C to obtain spores (Caffier et al., 2014). The cellophane sheets were dried and stored at -  
353 20°C. A spore suspension was made by collecting spores from these cellophane sheets and  
354 diluting them in water to a final concentration of  $1.5 \times 10^5$  spores mL<sup>-1</sup> (Lê Van et al., 2012).  
355 For each strain, the spore suspension was inoculated on three Gala trees and three GMAL  
356 3619.b trees using a mechanical air pressure sprayer. As trees actively grew during the  
357 experiment, we labelled the youngest fully deployed leaf of each tree as the F0 leaf, one or  
358 two days prior to inoculation to facilitate later disease scoring. To favor spore germination  
359 and fungal infection, the plants were kept in darkness with moisture maintained at 100% and  
360 temperature at 17°C for 48 hours after inoculation (Lê Van et al., 2012). Afterward, moisture  
361 was reduced to 80% during the day and 90% at night, with 12 hours of light per day. These  
362 climatic conditions are highly favourable to scab infection and thus provide a good indication  
363 of the strain ability to infect tree genotypes (MacHardy, 1996). For each host genotype, plants  
364 were randomized within three blocks to have in each block one host replicate for each strain.  
365 Disease severity, *i.e.*, virulence of the fungal strain, was measured when there was no more  
366 increase of the disease symptoms: at 19 days post inoculation (dpi) for *M. sieversii* and at 21  
367 dpi for *M. domestica*. Disease severity was measured as the percentage of a leaf displaying  
368 sporulation, from 0% when there was no disease symptom to 100% when the whole leaf was  
369 covered with spores. The F0 leaf being the last leaf deployed one or two days prior to  
370 inoculation, the assessment was done on the F0 leaf and on the first leaf under F0, named F1.

371

## 372 **Statistical analysis of phenotypic data**

373 The data of the two distinct inoculation experiments were standardized based on the data from  
374 the six calibration strains: the disease severity values were corrected to obtain the same mean  
375 between the two distinct experiments for the six calibration strains. The virulence of each  
376 strain was estimated as the mean percentage of scabbed leaf area across the two leaves F0 and  
377 F1 and across the three inoculated plants of a given genotype (either *M. domestica* or *M.*  
378 *sieversii*), so that there was one value per fungal strain and per apple tree genotype in the  
379 analysis. As the assumptions of normality were not met, we compared the medians of  
380 virulence between the three different populations (agricultural-type, wild-type and hybrids)  
381 using a Kruskal-Wallis and a *post-hoc* Wilcoxon test at 21 dpi on *M. domestica* and 19 dpi on  
382 *M. sieversii* in R (version 3.4.4; R Core Team, 2018), considering the different strains in each  
383 population as replicates for the population effect. In addition, a Kendall test was performed to  
384 analyse the correlation between virulence and hybrid index  $P_{agr}$  for the 20 hybrid strains.

385

## 386 **Demographic inference for wild and agricultural types of the apple scab fungus *Venturia*** 387 ***inaequalis***

388 In order to test demographic scenarios, and in particular the likelihood of divergence history  
389 without gene flow followed by a secondary contact in the fungal pathogen, we used the  
390 composite-likelihood, diffusion approximation-based approach for demographic inference  
391 implemented in  $\partial a \hat{\partial} i$  (Gutenkunst, Hernandez, Williamson & Bustamante, 2009). We used the  
392 33 reference *V. inaequalis* genomes described above, belonging to 15 wild-type and 18  
393 agricultural-type strains. In order to meet the requirement of marker independence, we

394 thinned the 1,210,121 available SNPs for these genomes to keep only one SNP every 5kb (a  
395 threshold set based on the LD decay curve, Figure S2) using vcfTools (Danecek et al., 2011),  
396 which left 6,187 SNPs. Using  $\hat{d}a\hat{d}i$  (Gutenkunst et al., 2009), we tested a set of four basic  
397 models (Tine et al., 2014): strict isolation (SI) in which the two lineages diverge without gene  
398 flow, isolation with migration (IM) in which the two lineages diverge with constant gene  
399 flow, ancient migration (AM) in which the two lineages diverge with gene flow and stop  
400 exchanging genes at a time noted  $T_{AM}$ , and secondary contact (SC) in which the two lineages  
401 diverge without gene flow and then exchange gene since a secondary contact occurring at  $T_{SC}$ .  
402 Each of these four models was evaluated and fitted with the observed joint allele frequency  
403 spectrum (jAFS) using 20 independent runs. Each run started with perturbed starting  
404 parameters, from which a global optimisation was done with a simulated annealing  
405 optimisation procedure and was followed by an optimisation phase with a maximum number  
406 of 100 iterations (<https://popgensealab.wordpress.com/dadi-inference/>; Christe et al., 2017;  
407 Tine et al., 2014). For nested models, likelihood ratio tests (LRTs) were used to identify the  
408 best model. For non-nested models, the relative likelihood of Akaike criterion (AIC) was used  
409 instead (Christe et al., 2017).

410 Demographic parameters were estimated for the four models. These parameters included  
411 migration rates in the two directions, effective sizes in the two lineages, divergence time and  
412 time elapsed since other demographic events ( $T_{AM}$  in AM model and  $T_{SC}$  in SC model). The  
413 ancestral effective size before the split was calculated as  $N_{ref} = \theta / (2 \times \mu \times L)$  (Gutenkunst et  
414 al., 2009), where  $\theta$  was estimated by  $\hat{d}a\hat{d}i$ ;  $\mu$  is the mutation rate per nucleotide per generation,  
415 estimated to be  $2 \times 10^{-8}$  from an analysis of divergence with the closely related species  
416 *Venturia pirina* parasitizing pear trees (Le Cam et al., 2019; data not shown).  $L$  is the effective  
417 genome length analyzed, being computed as  $G \times s/S$  (Gutenkunst et al., 2009), where  $G$  is the

418 size of the genome used,  $S$  is the total number of SNPs called in  $G$ , and  $s$  the actual number of  
419 SNPs used for inference. In our analysis, 1,210,121 SNPs were called on a portion of 34,942  
420 Mb of the genome, 6,187 SNPs were used, so that  $L$  was computed as  $34,942,000 \times (6,187 /$   
421  $1,210,121) = 178,648$  bp. All other parameters were scaled by  $N_{ref}$ . Times in years were  
422 computed using a generation time of one year, as *V. inaequalis* undergoes an obligate sexual  
423 reproduction once a year. The model parameters estimated and their 95% confidence intervals  
424 were obtained with Godambe methods (Coffman, Hsieh, Gravel & Gutenkunst, 2015) from  
425 1000 bootstraps across SNPs.

426

## 427 **Results**

### 428 **Contrasting distributions of the wild and agricultural host and pathogen populations in** 429 **the Tian Shan Mountains**

430 We explored the genetic makeup of apple trees and their scab pathogens in a wild  
431 environment, by sampling apple trees and fungal strains from the same trees, at nine sites in  
432 the forests of the Tian Shan Mountains in Kazakhstan. For apple trees, the PCA (Figure 2A)  
433 and STRUCTURE analysis (Figures S3A and B) confirmed the existence of two genetically  
434 distinct clusters corresponding to the orchard trees on the one hand, assigned to *M. domestica*,  
435 and most of the wild forest trees on the other hand, assigned to *M. sieversii*. We did not detect  
436 further population subdivision within the wild species (Figures 2A and S3). Both the first axis  
437 of the PCA and STRUCTURE analyses revealed footprints of admixture between the two tree  
438 species. The  $P_{dom}$  hybrid index values were also estimated for the 240 successfully genotyped  
439 trees. All three methods gave congruent results (Figs. 2A and S3C). The correlation  
440 coefficient between  $P_{dom}$  and the coordinates of the first PCA axis was high and significant

441 ( $r=-0.97$ ;  $p$ -value  $< 0.001$ ; Figure S4A). The correlations between the ancestry proportion  
442 inferred by STRUCTURE and  $P_{dom}$  on the one hand, and between the ancestry proportion  
443 inferred by STRUCTURE and the coordinates of the first axis of the PCA on the other hand,  
444 were also high and significant ( $r=0.96$ ,  $p$ -value $<0.001$ , and  $r=-0.97$ ,  $p$ -value $<0.001$ ,  
445 respectively). Based on the  $P_{dom}$  hybrid index, we identified 78% pure wild *M. sieversii* trees,  
446 ca. 12% *M. domestica* trees and near 10% hybrid trees (Figure 2A; Table S1). The species  
447 identified genetically were consistent with our expectations during sampling: only one *M.*  
448 *domestica* was identified in the natural forest sites (Figure 3), whereas most of the trees  
449 sampled in the orchard belonged to *M. domestica* (28 out of 30 trees sampled in the orchard,  
450 with 14 different genotypes). Three of the forest sites contained only *M. sieversii* trees, but the  
451 four other forest sites contained both *M. sieversii* and hybrid trees (with hybrid trees  
452 representing 11.1 to 27.6%, Figures 3), as did the forest site directly surrounding the orchard  
453 (with hybrid trees reaching there 27.3%).

454 For *V. inaequalis*, the PCA (Figure 2B) and STRUCTURE analysis (Figures S5A and B)  
455 confirmed the existence of two differentiated populations and the lack of further subdivision,  
456 and revealed admixture between the wild and agricultural populations (Figures 2B and S5B).  
457 The hybrid index  $P_{agr}$ , the ancestry coefficient given by STRUCTURE and the first axis of the  
458 PCA, separating individuals according to their degree of ancestry into the two divergent  
459 populations (Figure 2B), gave congruent results (Figure S5C). The correlation coefficient  
460 between  $P_{agr}$  and the first axis of the PCA was high and significant ( $r=0.99$ ;  $p$ -value $=0.001$ )  
461 (Figure S4B). The correlations between the ancestry proportion inferred by STRUCTURE  
462 and  $P_{agr}$  on the one hand, and between the ancestry proportion inferred by STRUCTURE and  
463 the coordinates of the first axis of the PCA on the other hand, were also high and significant  
464 ( $r=0.99$ ,  $p$ -value $<0.001$  and  $r=0.98$ ,  $p$ -value $<0.001$ , respectively).

465 The  $P_{agr}$  hybrid index estimated for the 255 *V. inaequalis* strains displayed a U-shaped  
466 distribution, with 33 fungal strains (12.9%) having  $P_{agr}$  values between 0.1 and 0.9, thus being  
467 considered to be hybrids, and with high frequencies of pure agricultural-type (38.5%) and  
468 pure wild-type (48.6%) fungal genotypes (Figure 2B; Table S1). All the fungal strains  
469 sampled in the orchard carried alleles typical of the agricultural-type (Figure 3), and the  
470 fungal strains sampled on the surrounding forest were mostly either agricultural-type or wild-  
471 type genotypes. A single hybrid strain was detected in the forest surrounding the orchard,  
472 whereas 3.4% to 37% of the fungal strains were hybrids in the other forest sites (Figure 3).

473 In order to further explore the relationship between host and pathogen genotypes, we  
474 compared their genetic diversity and differentiation across the sampling sites. Genetic  
475 diversities per sampling site ranged from 0.703 (tuk) to 0.802 (kot) for apple trees and from  
476 0.244 (tuk) to 0.487 (kot) for *V. inaequalis* (Table S4). Genetic diversities were minimal and  
477 maximal in the same sampling sites for both the host and the pathogen, but no significant  
478 correlation was observed between the apple and fungus genetic diversity levels across sites  
479 (Kendall's tau=0.389, p-value=0.18; Figure S6). Global  $F_{ST}$  among sites were 0.259 for apple  
480 trees and 0.243 for *V. inaequalis*. Pairwise  $F_{ST}$  estimates ranged from 0.000 to 0.207 for apple  
481 trees (Table S5) and from 0.000 to 0.721 for *V. inaequalis* (Table S6). For both the host and  
482 the pathogen, the orchard (esi\_o) was the most differentiated from other sampling sites  
483 (Tables S5 and S6). Host and pathogen pairwise differentiation matrices were significantly  
484 correlated (Mantel-test Z-score=0.681, p-value=0.011; Figure S7). Yet, we found no  
485 significant correlation between pairwise  $F_{ST}$  and geographical distances matrices, neither for  
486 apple trees (Mantel test Z-score= 33.10, p-value=0.42) nor for *V. inaequalis* (Mantel test Z-  
487 score=103.20, p-value=0.51), indicating a lack of isolation by distance.

488

489 **All pathogen types occur on wild apple trees, but wild-type pathogens occur only on**  
490 **trees with no domesticated ancestry**

491 We investigated the association between the fungal pathogen types and the *Malus* genotypes.  
492 From the 240 trees and 255 fungal strains successfully genotyped, we could obtain 249 host-  
493 pathogen pairs, several strains having been isolated from the same host trees. A sharp L-  
494 shaped pattern was observed when the hybrid index values of the host trees were plotted  
495 against those of their associated fungal genotype (Figure 4A). Hybrids were found among  
496 both trees and fungi, but no hybrid pathogens were collected from hybrid trees. Hybrid and  
497 wild-type fungi were found only on wild apple trees, whereas agricultural-type fungi were  
498 found on all types of apple trees, across the whole range of the hybrid index.

499

500 **Genetic determinants of host adaptation in *Venturia inaequalis***

501 In order to identify SNPs predicting the ability of fungal genotypes to parasitize the host  
502 species, we performed a DAPC on the genotypes of the 249 *V. inaequalis* strains, with groups  
503 defined *a priori* based on the assignment of their collection tree as *M. domestica*, hybrid or *M.*  
504 *sieversii*. The first linear discriminant function (LD1) clearly separated the strains sampled on  
505 domesticated apple trees from those sampled on wild and hybrid apple trees (Figure S8). The  
506 second linear function separated strains found on hybrid apple trees from the ones sampled on  
507 *M. sieversii* (LD2, Figure S8). The analysis of allele contribution (loadings) to the first  
508 discriminant function revealed that the SNP *V\_08160\_319* was strongly involved in the  
509 genetic differentiation between strains parasitizing *M. domestica* and those found on hybrid  
510 and wild hosts (loading of 0.123, Figure S9), while the other SNPs showed much lower

511 contributions (from  $8.723 \times 10^{-8}$  to 0.024). The estimate of global  $F_{ST}$  was accordingly much  
512 higher for the V\_08160\_319 locus ( $F_{ST} = 0.887$ ) than for other loci (Figure S10).

513 The SNP V\_08160\_319 was located in a gene identified as a small secreted protein (SSP)  
514 using the protocol described in Le Cam et al. (2019). The two alleles of this SNP were A and  
515 G and corresponded to a non-synonymous site. According to the gene allelic sequences in the  
516 33 reference genomes, the V\_08160\_319 SNP was associated to a second one in the same  
517 codon, which thus corresponded to a TGA stop codon versus a TAC codon, coding for a  
518 tyrosine, at the 140th codon in the 295 amino-acid long protein. Out of the 189 strains for  
519 which genotypes for this SNP were available, the stop codon allele indeed had frequencies of  
520 1.00 on *M. domestica* (N=28), 0.92 on hybrid apple trees (N=13) and 0.06 on *M. sieversii*  
521 (N=148) (Figure 4B). Considering ancestry of fungal strains, the stop codon allele had a  
522 frequency of 0.89 (N=56) in the agricultural-type population and 0 in the wild-type population  
523 (N=107) and in hybrids (N=26). The detection of only A (tyrosine) alleles in hybrids  
524 significantly deviated from expectations under the hypothesis of neutral segregation at this  
525 locus given the allele frequencies in the pure populations (Binomial-test,  $p\text{-value} = 6.10 \times 10^{-5}$ ).

526 To assess which allele was ancestral, we used five available genomes (Le Cam et al., 2019)  
527 belonging to the outgroup *V. inaequalis* lineage parasitising *Pyraecantha* (Gladieux et al.,  
528 2010a; Le Cam et al., 2002). These genomes carried the TAC codon, as did the wild-type *V.*  
529 *inaequalis* population on *M. sieversii*. This means that the stop codon truncating the small  
530 secreted protein is a derived allele, and has evolved in the agricultural *V. inaequalis*  
531 population on *M. domestica*.

532

533 **Agricultural-type and hybrid fungal strains are more virulent than wild-type strains**



534 We then investigated experimentally whether the observed association between fungal  
535 pathogen types and host tree species resulted from differences in infection ability, by  
536 inoculating 57 fungal strains (20 agricultural-type, 17 wild-type and 20 hybrid strains; Table  
537 S1) on one genotype of *M. sieversii* and one genotype of *M. domestica*. All agricultural-type  
538 strains could cause disease on *M. domestica* (N=20; Figures 5A and 6A), whereas only one  
539 wild-type and two hybrid strains could cause disease on *M. domestica*, and even then, only  
540 with very low levels of virulence (less than 2% of diseased leaf area, Figure 5A). All  
541 agricultural strains (N=20), hybrids (N=20) and wild strains (N=17) could cause disease on  
542 *M. sieversii* (Figure 5B). Both agricultural-type and hybrid strains were significantly more  
543 virulent (i.e. caused larger and/or more lesions) than wild-type strains on *M. sieversii* (Figures  
544 5B and 6B; Wilcoxon tests:  $P=1.7 \times 10^{-5}$  and  $P=1.2 \times 10^{-4}$ , respectively). The *V. inaequalis*  
545 hybrids displayed virulence levels on *M. sieversii* that appeared intermediate between the  
546 agricultural-type and wild-type populations although the difference between hybrids and the  
547 agricultural-type population was not significant (Figure 5B). Similar results were obtained  
548 when assignment to species and hybrids were done using the same hybrid index threshold as  
549 for apple trees (wild type:  $Pagr < 0.2$ ; hybrids:  $0.2 \leq Pagr \leq 0.8$ ; agricultural:  $Pagr > 0.8$ ; Figure  
550 S11). We found no significant correlation between the proportion of agricultural-type ancestry  
551 and the degree of virulence in the hybrid fungal strains (Figure S12; Kendall test:  $\tau = -0.047$ ,  
552  $P = 0.7702$ ).

553 The allele at the outlier locus *V\_081690\_319* partially explained the virulence on *M.*  
554 *domestica*. Forty-seven genotypes were available out of 57 strains used in the experiment.  
555 Out of the 15 agricultural-type strains with available genotypes, 13 (87%) carried the stop  
556 codon (TGA) allele. Conversely, all the 15 hybrid strains with available genotypes (100%), as  
557 well as all the 17 wild strains (100%), carried the tyrosine (TAC) allele. When comparing the

558 two groups of strains corresponding to their alleles at the *V\_081690\_319* locus, we found that  
559 the strains carrying the stop codon (TGA) allele were more virulent than those carrying the  
560 tyrosine (TGA) allele, both on *M. domestica* and on *M. sieversii* (Wilcoxon tests:  $P=1.4 \times 10^{-8}$   
561 and  $P=1.2 \times 10^{-3}$ , respectively; Figure S13). Most of the strains carrying the tyrosine allele  
562 could not cause disease at all on *M. domestica*, but a few of them could induce a low level of  
563 symptoms (Figure S13A).

564

565 **Demographic inference on the divergence history of wild-type and agricultural-type**  
566 ***Venturia inaequalis* populations**

567 We performed demographic inferences in order to test if the observed co-occurrence and  
568 hybridization of wild and agricultural-type *V. inaequalis* populations in Kazakhstan resulted  
569 from divergence with gene flow or originated from a secondary contact, following the  
570 introduction of *M. domestica*, about one century ago in a few orchards in forests of wild *M.*  
571 *sieversii*. We compared the likelihoods of four contrasted scenarios of divergence, with either  
572 strict isolation, isolation with continuous migration, isolation with initial migration or  
573 secondary contact (Figure 7A).

574 The models allowing gene flow received better support than the strict isolation model (AIC=  
575 2403,587014; LogL= -1197,793507). The model of isolation with migration (IM; AIC=  
576 1975,638252; LogL= -981,8191258) did not perform significantly better than the ancient  
577 migration model (AM; AIC= 1977,698045; LogL= -981,8490226). The secondary contact  
578 model (SC) received the best support (AIC= 1871,313317, LogL= -928,6566583), which  
579 indicated that the agricultural-type *V. inaequalis* population was likely absent in Asian wild  
580 apple forests before the recent introduction of domesticated apple trees in orchards (Figure  
581 7B; Table 1). Using the estimate of  $\theta$  obtained from the best model (SC,  $\theta=143.729$ ), a

582 mutation rate  $\mu$  of  $2 \times 10^{-8}$ , we found that the ancestral effective size before split,  $N_{ref}$ , was near  
583 20,000 individuals (Figure 7C). Parameter estimates for the secondary contact model  
584 indicated that the divergence between the wild-type and agricultural-type *V. inaequalis*  
585 populations occurred 4,570 years ago ( $4,570 \pm 324$  SD) followed by a secondary contact 130  
586 years ago ( $130 \pm 9$  SD). This scenario and estimates are consistent with a fungal divergence  
587 triggered by apple domestication under strict genetic isolation, followed by a recent secondary  
588 contact promoted by modern orchards (Figure 7C).

589

## 590 **Discussion**

### 591 **Gene flow between apple trees species may threaten the genetic integrity of the Asian** 592 **wild apple**

593 Our data show that *M. sieversii* wild apple trees are affected by gene flow following the  
594 introduction of the domesticated apple trees in orchards near the natural apple forests of the  
595 Kazakh Tian Shan Mountains. Gene flow from *M. domestica* to *M. sieversii* had previously  
596 been suggested (Cornille et al. 2012; Omasheva et al., 2017), and we reveal here the strong  
597 impact of the presence of orchards close to wild forests. Currently, gene flow appears to pose  
598 a less severe threat to *M. sieversii* than it does to *M. sylvestris* in Europe, where wild  
599 European crabapple tree populations display massive introgression from the cultivated apple  
600 tree, to the extent that the European wild species is considered as endangered (Cornille et al.,  
601 2015; Feurtey et al., 2017). The lower level of introgression in *M. sieversii* wild populations  
602 in Central Asia is probably due to more recent and much less extensive secondary contact  
603 between wild and cultivated species than in Europe. The cultivated apple tree was introduced  
604 into Europe before the 3<sup>rd</sup> century BC (Cornille et al., 2014), whereas it was not introduced

605 into the area sampled in this study until about 100 years ago, and much less extensively than  
606 in Europe. Furthermore, the higher density of *M. sieversii* trees in Kazakh wild forests (Harris  
607 et al., 2002; Vavilov, 1931) than of *M. sylvestris* in European wild forests probably also  
608 restricts gene flow from cultivated apple trees. Indeed, pollination distances decrease with  
609 density around pollinated trees in European wild apple trees, longer pollination distances  
610 increasing the risk of interspecific mating with cultivated trees (Feurtey et al. 2017; Reim et  
611 al. 2015).

612 While the overall percentage of apple tree hybrids in the wild forest remained low, near 25%  
613 of the trees were found to be hybrids in the forest immediately adjacent to a cultivated  
614 orchard, as well as in the forest location that was the closest to the peri-urban environment of  
615 Almaty. These findings confirm the weak interspecific reproductive barriers reported for the  
616 *Malus* genus (Zohary & Hopf, 2000) and raise concerns about the consequences of increasing  
617 human-induced changes in this region. As indicated by the IUCN Red List, *M. sieversii* is  
618 already threatened by its range shrinking in Central Asia (Eastwood, Lazkov & Newton,  
619 2009), with a disappearance of more than 70% of the apple wild forest area over the last 30  
620 years due to agricultural expansion and overgrazing. In addition to this range reduction, our  
621 results support the view that the genetic integrity of *M. sieversii* may be also threatened. Thus,  
622 unless preventive measures are taken to protect Central Asian forests, it may only be a  
623 question of time before the genetic integrity of *M. sieversii* deteriorates in Central Asia, as  
624 already observed for *M. sylvestris* in Europe (Cornille et al., 2015; Feurtey et al., 2017), as  
625 well as for other European native plant species such as poplars (Bleeker, Schmitz & Ristow,  
626 2007; Rhymer & Simberloff, 1996; Vanden Broeck, Villar, Van Bockstaele & Van Slycken,  
627 2005).

628

629 **Recent invasion of the wild forests by the agricultural *V. inaequalis* population**

630 We confirm in this study the existence of two differentiated *V. inaequalis* populations in  
631 Central Asia. The high differentiation level between the agricultural-type and wild-type *V.*  
632 *inaequalis* populations raises the question of whether they should be considered as separate  
633 species. However, further studies are needed to assess the taxonomic status of the *V.*  
634 *inaequalis* lineages, especially as hybrids were found.

635 Most importantly, we show that agricultural-type and wild-type *V. inaequalis* populations  
636 came into a recent secondary contact after having diverged in strict isolation during apple tree  
637 domestication. Indeed, demographic inferences showed that agricultural-type and wild-type  
638 fungal populations initially diverged without gene flow about 4,500 years ago, a time  
639 consistent with that of apple tree domestication, and came into secondary contact about one  
640 century ago, i.e., when domesticated apple trees were introduced in Central Asia. This  
641 secondary contact has led to the recent invasion of the agricultural-type population in the wild  
642 *M. sieversii* forest and to the production of hybrids.

643

644 **The agricultural-type *V. inaequalis* population is able to parasitize both wild and**  
645 **domesticated host trees**

646 We uncovered contrasting host range patterns among *V. inaequalis* populations: wild-type and  
647 hybrid fungal strains were only found on *M. sieversii* trees, whereas agricultural-type fungal  
648 strains were found on trees of all types of ancestry. Pathogenicity tests in controlled  
649 conditions matched the distribution observed in nature. Indeed, the agricultural-type fungal  
650 strains were able to cause disease on *M. domestica* and *M. sieversii* whereas the wild-type and

651 hybrid fungal strains could induce symptoms only on wild host trees. These results, obtained  
652 with high spore concentration and in favorable climatic conditions, are conservative and  
653 confirm conclusions that were previously obtained with a limited number of *V. inaequalis*  
654 strains (Lê Van et al., 2012). Furthermore, we detected agricultural-type *V. inaequalis* strains  
655 at eight different sites in the wild forests on numerous different trees, suggesting that the  
656 agricultural-type population can parasitize a large range of *M. sieversii* genotypes. In contrast,  
657 no wild-type or hybrid fungal strain was detected on any of the *M. domestica* genotypes  
658 present in the orchard. This host range pattern likely explains the significant correlation found  
659 between apple tree and *V. inaequalis* pairwise  $F_{ST}$  matrices, which was not due to isolation by  
660 distance patterns in hosts and pathogens. Indeed, it is likely that the *M. domestica* ancestry  
661 proportion in each site drives the allele frequency distribution in *V. inaequalis* by selection,  
662 because *M. domestica* can only be parasitized by agricultural-type strains, and not by wild-  
663 type or hybrid pathogens. This situation contrasts with that reported for poplars, in which the  
664 hybrid fungal pathogen *Melampsora x columbiana* can parasitize both pure species and hybrid  
665 trees (Newcombe et al., 2000).

666 In addition, the agricultural *V. inaequalis* population and hybrids displayed greater virulence  
667 on wild apple trees than its own endemic wild-type population. This is consistent with the  
668 process known as “pestification” (Saleh, Milazzo, Adreit, Fournier & Tharreau, 2014), under  
669 which selection by humans of more resistant plants unwittingly leads pathogens to accumulate  
670 more virulence traits and to cause more severe symptoms. This could add further threats for  
671 the wild tree species in its natural habitat. Indeed, the scab disease on apple tree leaves  
672 reduces photosynthesis (Spotts & Ferree, 1979), which may affect the growth of the plants.  
673 While such increase in virulence may have a limited impact on the growth of adult trees, its  
674 effect on the growth of young seedlings could be severe. Furthermore, scab disease can lead

675 to early fruit fall (MacHardy, 1996), which may decrease seed number, thereby affecting host  
676 population dynamics. On *M. sieversii*, hybrid strains were more virulent than wild-type fungal  
677 strains but not significantly different from agricultural-type fungal strains. Thus, although the  
678 hybridization between fungal lineages does not currently appear to increase damages on wild  
679 trees compared to the pure agricultural pathogen, it might participate in the invasion of the  
680 disease on the wild host. Future experiments are still needed to estimate precisely the disease  
681 fitness effect on seedlings and on the number of seeds produced by adult trees in order to  
682 ascertain the long-term impact of this pathogen population on the wild tree natural  
683 populations. Nevertheless, our results already suggest that the invasion of the wild forests by  
684 the agricultural-type *V. inaequalis* population could further threaten natural *M. sieversii*  
685 populations.

686

### 687 **The genomic determinants of pestification: a likely new virulence gene**

688 Our findings suggest the evolution of *V. inaequalis* populations by host tracking of the  
689 domesticated apple tree without the loss of its ability to parasitize the wild host. Many  
690 resistance genes have been introgressed into *M. domestica* during domestication and modern  
691 breeding (Cornille et al., 2012). During its evolutionary tracking of apple trees evolution, the  
692 agricultural *V. inaequalis* population has probably accumulated multiple alleles allowing to  
693 counteract the crop resistance genes, potentially including the truncated allele of the small  
694 secreted protein identified in this study as a putative avirulence gene. Indeed, we found that  
695 the host lineage on which *V. inaequalis* strains were sampled was predicted by a SNP in a  
696 gene encoding a small secreted protein. In the fungal strains collected on *M. domestica*, the  
697 allele corresponded to a stop codon while strains sampled on *M. sieversii* carried the full-

698 length gene. Taken together with the presence of the full-length gene in an outgroup, the *V.*  
699 *inaequalis* lineage parasitizing *Pyracantha* (Gladieux et al., 2010a; Le Cam et al., 2002), this  
700 suggests the acquisition of a virulence allele by the agricultural *V. inaequalis* population  
701 during crop host tracking, through the loss of a protein recognized by the domesticated apple  
702 tree selected for resistance to apple scab. Such an increase in the virulence of a pathogen  
703 following domestication of its host is compatible with the pestification process (Salehet al.,  
704 2014), and is consistent with virulence evolution mechanisms previously found in many crop  
705 pathogens (Raffaele & Kamoun, 2012).

706 The identification of a putative avirulence gene from a small set of 181 SNPs can be  
707 explained by the initial choice of these SNPs as the most differentiated between the fungal  
708 populations and located within genes. However, we cannot exclude that the *V\_081690\_319*  
709 SNP is not directly involved in host adaptation but is instead linked to a genomic determinant  
710 of host adaptation. Future functional experiments are required to confirm that the identified  
711 gene is an avirulence gene. On the plant side, the identification of the receptor involved in the  
712 recognition of this putative avirulent protein could lead to the discovery of a new resistance  
713 gene.

714 More comprehensive studies on whole *V. inaequalis* genomes will likely detect further SNPs  
715 involved in host adaptation, as suggested by our data. Indeed, the SNP allele corresponding to  
716 the stop codon (G allele) was not found in any of the 15 hybrids for which genotypes were  
717 available, which significantly deviated from neutral expectations, while agricultural-type  
718 strains carrying this allele were found on *M. sieversii*, even if it was at low frequency. In  
719 addition, a few strains carrying the full-length allele of the putative avirulence gene were able  
720 to cause some symptoms on *M. domestica* in artificial inoculations. This suggests that the stop



721 codon allele was not selected against on *M. sieversii* in itself but may be deleterious in  
722 association with alleles at other loci in hybrids. These results therefore suggest that the locus  
723 *V\_081690\_319* is involved in epistatic interactions with other genes and that hybridization  
724 breaks up beneficial allelic combinations required to parasitize *M. domestica*. Furthermore,  
725 the *V. inaequalis* hybrids appeared quantitatively intermediate in virulence on *M. sieversii*,  
726 although the virulence difference with the agricultural population was not significant.  
727 Intermediate values in hybrids for haploid organisms suggest the implication of multiple  
728 genes in virulence.

729

### 730 **Conclusion**

731 We found that natural *M. sieversii* populations are currently only mildly affected by gene flow  
732 from *M. domestica*, which was introduced into the area about a century ago but still remains  
733 very rare in the Kazakh mountains. Further disturbances in this area might however lead to  
734 much higher levels of crop-to-wild gene flow, as already reported in Europe for the European  
735 crabapple (Cornille et al., 2013; 2015; Feurtey et al. 2017). In addition, the agricultural-type  
736 *V. inaequalis* population is invading wild forests and is introgressing the wild-type *V.*  
737 *inaequalis* population, probably due to the greater virulence of the agricultural-type fungal  
738 population acquired during its tracking of apple tree domestication. Furthermore, our study  
739 represents one of the very rare joint analyses of host and pathogen populations (Croll &  
740 Laine, 2016), despite their importance for understanding the evolutionary mechanisms and  
741 histories leading to host specialization and local adaptation. Thanks to the study of host and  
742 pathogen pairs, we could identify a putative avirulence gene that may be of great importance

743 on a cultivated crop, and a similar approach may be widely used in future studies on host and  
744 pathogen populations.

745

## 746 **Acknowledgments**

747 The authors thank C. Peix and kazakh forestry agents for their assistance in sampling, M.  
748 Cascales for her assistance in SNPs data analyzing, N. Bierne, R. Nielsen and M. Slatkin for  
749 helpful discussions. They acknowledge the staff at the GENTYANE genotyping platform  
750 (INRA GDEC, Clermont-Ferrand, France) for SNP and microsatellite genotyping. Authors  
751 are also grateful to Pascal Heitzler for providing *M. sieversii* budwoods. They are also most  
752 grateful to the PHENOTIC core facility (Angers, France) for its technical support. This study  
753 was funded by grants from ANR-12-ADAP-0009 (Gandalf project), from INRA-SPE  
754 Department (Escapades project), by a Louis D. grant (Institut de France) to TG, a PhD grant  
755 from the Région Ile-de-France to AF, and by the program “Objectif Végétal, Research,  
756 Education and Innovation in Pays de la Loire”, supported by the French Region Pays de la  
757 Loire, Angers Loire Métropole and the European Regional Development Fund (Escapes  
758 project).

759

## 760 **References**

- 761 Bleeker, W., Schmitz, U., & Ristow, M. (2007). Interspecific hybridisation between alien and  
762 native plant species in Germany and its consequences for native biodiversity. *Biological*  
763 *Conservation*, 137(2), 248-253. doi: 10.1016/j.biocon.2007.02.004
- 764 Caffier, V., Lasserre-Zuber, P., Giraud, M., Lascostes, M., Stievenard, R., Lemarquand, A., ...  
765 Le Cam, B. (2014). Erosion of quantitative host resistance in the apple × *Venturia inaequalis*  
766 pathosystem. *Infection, Genetics and Evolution*, 27, 481-489. doi:  
767 10.1016/j.meegid.2014.02.003

- 768 Christe, C., Stölting, K. N., Paris, M., Fraïsse, C., Bierne, N., & Lexer, C. (2017). Adaptive  
769 evolution and segregating load contribute to the genomic landscape of divergence in two tree  
770 species connected by episodic gene flow. *Molecular Ecology*, 26(1), 59-76. doi:  
771 10.1111/mec.13765
- 772 Coffman, A. J., Hsieh, P. H., Gravel, S., & Gutenkunst, R. N. (2015). Computationally  
773 efficient composite likelihood statistics for demographic inference. *Molecular Biology and  
774 Evolution*, 33(2), 591-593. doi: 10.1093/molbev/msv255
- 775 Cornille, A., Feurtey, A., Gélin, U., Ropars, J., Misvanderbrugge, K., Gladieux, P., & Giraud,  
776 T. (2015). Anthropogenic and natural drivers of gene flow in a temperate wild fruit tree: a  
777 basis for conservation and breeding programs in apples. *Evolutionary Applications*, 8(4), 373-  
778 384. doi: 10.1111/eva.12250
- 779 Cornille, A., Giraud, T., Smulders, M. J., Roldán-Ruiz, I., & Gladieux, P. (2014). The  
780 domestication and evolutionary ecology of apples. *Trends in Genetics*, 30(2), 57-65. doi:  
781 10.1016/j.tig.2013.10.002
- 782 Cornille, A., Gladieux, P., & Giraud, T. (2013). Crop-to-wild gene flow and spatial genetic  
783 structure in the closest wild relatives of the cultivated apple. *Evolutionary Applications*, 6(5),  
784 737-748. doi: 10.1111/eva.12059
- 785 Cornille, A., Gladieux, P., Smulders, M. J., Roldan-Ruiz, I., Laurens, F., Le Cam, B., ...  
786 Gabrielyan, I. (2012). New insight into the history of domesticated apple: secondary  
787 contribution of the European wild apple to the genome of cultivated varieties. *PLoS genetics*,  
788 8(5), e1002703. doi: 10.1371/journal.pgen.1002703
- 789 Croll, D., Laine, A. L. (2016). What the population genetic structures of host and pathogen  
790 tell us about disease evolution. *New Phytologist*, 212(3):537-539. doi: 10.1111/nph.14203.
- 791 Danecek, P., Auton, A., Abecasis, G., Albers, C. A., Banks, E., DePristo, M. A., ... McVean,  
792 G. (2011). The variant call format and VCFtools. *Bioinformatics*, 27(15), 2156-2158. doi  
793 :10.1093/bioinformatics/btr330
- 794 Depotter, J. R. L., Seidl, M. F., Wood, T. A., Thomma, B. P. H. J. (2016). Interspecific  
795 hybridization impacts host range and pathogenicity of filamentous microbes. *Current Opinion  
796 in Microbiology*, 32:7-13
- 797 de Vienne, D. M., Hood, M. E., & Giraud, T. (2009). Phylogenetic determinants of potential  
798 host shifts in fungal pathogens. *Journal of Evolutionary Biology*, 22(12), 2532-2541. doi:  
799 10.1111/j.1420-9101.2009.01878.x
- 800 Dray, S., & Dufour, A. B. (2007). The ade4 package: implementing the duality diagram for  
801 ecologists. *Journal of statistical software*, 22(4), 1-20. doi: 10.18637/jss.v022.i04
- 802 Earl, D. A. & vonHoldt, B. M. (2012). STRUCTURE HARVESTER: a website and program  
803 for visualizing STRUCTURE output and implementing the Evanno method. *Conservation  
804 Genetics Resources*, 4 (2), 359-361. doi: 10.1007/s12686-011-9548-7
- 805 Eastwood, A., Lazkov, G., & Newton, A. (2009). *The red list of trees of Central Asia*. Fauna  
806 and Flora International.
- 807 Ellstrand, N. C., Meirmans, P., Rong, J., Bartsch, D., Ghosh, A., De Jong, T. J., ... Strasburg,  
808 J. L. (2013). Introgression of crop alleles into wild or weedy populations. *Annual Review of*

- 809 *Ecology, Evolution, and Systematics*, 44, 325-345. doi: 10.1146/annurev-ecolsys-110512-  
810 135840
- 811 Evanno, G., Regnaut, S. & Goudet, J. (2005). Detecting the number of clusters of individuals  
812 using the software structure: a simulation study. *Molecular Ecology*, 14, 2611-2620.  
813 doi:10.1111/j.1365-294X.2005.02553.x
- 814 Falush, D., Stephens, M. & Pritchard, J. K. (2003). Inference of population structure:  
815 Extensions to linked loci and correlated allele frequencies. *Genetics*, 164(8), 1567-1587.
- 816 Feurtey, A., Cornille, A., Shykoff, J. A., Snirc, A., & Giraud, T. (2017). Crop-to-wild gene  
817 flow and its fitness consequences for a wild fruit tree: Towards a comprehensive conservation  
818 strategy of the wild apple in Europe. *Evolutionary Applications*, 10(2), 180-188. doi:  
819 10.1111/eva.12441
- 820 Feurtey, A., & Stukenbrock, E. H. (2018). Interspecific gene exchange as a driver of adaptive  
821 evolution in fungi. *Annual Review of Microbiology*, 72, 377-398. doi: 10.1146/annurev-micro-  
822 090817-062753
- 823 Forsline, P. L., Aldwinckle, H. S., Dickson, E. E., Luby, J. J., & Hokanson, S. C. (2003).  
824 Collection, maintenance, characterization, and utilization of wild apples of Central Asia.  
825 *Horticultural reviews*, 29, 1-62.
- 826 Giraud, T., Refrégier, G., Le Gac, M., de Vienne, D. M., & Hood, M. E. (2008). Speciation in  
827 fungi. *Fungal Genetics and Biology*, 45(6), 791-802. doi: 10.1016/j.fgb.2008.02.001
- 828 Gladieux, P., Caffier, V., Devaux, M., Le Cam, B. (2010a). Host-specific differentiation  
829 among populations of *Venturia inaequalis* causing scab on apple, pyracantha and loquat.  
830 *Fungal Genetics and Biology*, 47(6), 511-521. doi: 10.1016/j.fgb.2009.12.007
- 831 Gladieux, P., Vercken, E., Fontaine, M. C., Hood, M. E., Jonot, O., Couloux, A., & Giraud, T.  
832 (2011). Maintenance of fungal pathogen species that are specialized to different hosts:  
833 allopatric divergence and introgression through secondary contact. *Molecular Biology and*  
834 *Evolution*, 28(1), 459-471. doi: 10.1093/molbev/msq235
- 835 Gladieux, P., Zhang, X. G., Afoufa-Bastien, D., Sanhueza, R. M. V., Sbaghi, M., & Le Cam,  
836 B. (2008). On the origin and spread of the scab disease of apple: out of central Asia. *PLoS*  
837 *One*, 3(1), e1455. doi: 10.1371/journal.pone.0001455
- 838 Gladieux, P., Zhang, X. G., RóLdan-Ruiz, I., Caffier, V., Leroy, T., Devaux, M., ... Le Cam,  
839 B. (2010b). Evolution of the population structure of *Venturia inaequalis*, the apple scab  
840 fungus, associated with the domestication of its host. *Molecular Ecology*, 19(4), 658-674. doi  
841 :10.1111/j.1365-294X.2009.04498.x
- 842 Gompert, Z., & Alex Buerkle, C. (2010). INTROGRESS: a software package for mapping  
843 components of isolation in hybrids. *Molecular Ecology Resources*, 10(2), 378-384. doi:  
844 10.1111/j.1755-0998.2009.02733.x
- 845 Gutenkunst, R. N., Hernandez, R. D., Williamson, S. H., & Bustamante, C. D. (2009).  
846 Inferring the joint demographic history of multiple populations from multidimensional SNP  
847 frequency data. *PLoS Genetics*, 5(10), e1000695. doi: 10.1371/journal.pgen.1000695

- 848 Hanage, W. P., Fraser, C., Tang, J., Connor, T. R., & Corander, J. (2009). Hyper-  
849 recombination, diversity, and antibiotic resistance in pneumococcus. *Science*, 324(5933),  
850 1454-1457. doi: 10.1126/science.1171908
- 851 Harris, S. A., Robinson, J. P., & Juniper, B. E. (2002). Genetic clues to the origin of the apple.  
852 *Trends in Genetics*, 18(8), 426-430. doi: 10.1016/S0168-9525(02)02689-6
- 853 Harshman, J. M., Evans, K. M., Allen, H., Potts, R., Flamenco, J., Aldwinckle, H. S., ...  
854 Norelli, J. L. (2017). Fire blight resistance in wild accessions of *Malus sieversii*. *Plant*  
855 *disease*, 101(10), 1738-1745. doi: 10.1094/PDIS-01-17-0077-RE
- 856 Hooftman, D. A. P., Jong, M. J. D., Oostermeijer, J. G. B., & Den Nijs, H. J. C. M. (2007).  
857 Modelling the long-term consequences of crop-wild relative hybridization: a case study using  
858 four generations of hybrids. *Journal of Applied Ecology*, 44(5), 1035-1045. doi:  
859 10.1111/j.1365-2664.2007.01341.x
- 860 Hovick, S. M., Campbell, L. G., Snow, A. A., & Whitney, K. D. (2012). Hybridization alters  
861 early life-history traits and increases plant colonization success in a novel region. *The*  
862 *American Naturalist*, 179(2), 192-203. doi: 10.1086/663684
- 863 Ioos, R., Andrieux, A., Marçais, B., & Frey, P. (2006). Genetic characterization of the natural  
864 hybrid species *Phytophthora alni* as inferred from nuclear and mitochondrial DNA analyses.  
865 *Fungal Genetics and Biology*, 43(7), 511-529. doi: 10.1016/j.fgb.2006.02.006
- 866 Jakobsson, M. & Rosenberg, N. A. (2007). CLUMPP: a cluster matching and permutation  
867 program for dealing with label switching and multimodality in analysis of population  
868 structure. *Bioinformatics*, 23(14), 1801-1806.
- 869 Jombart, T. (2008). adegenet: a R package for the multivariate analysis of genetic markers.  
870 *Bioinformatics*, 24, 1403-1405. doi: 10.1093/bioinformatics/btn129
- 871 Jombart, T., Devillard, S., & Balloux, F. (2010). Discriminant analysis of principal  
872 components: a new method for the analysis of genetically structured populations. *BMC*  
873 *Genetics* 11: 94.
- 874 Le Cam, B., Parisi, L. & Arene, L. (2002). Evidence of two *formae speciales* in *Venturia*  
875 *inaequalis*, responsible for apple and Pyracantha scab. *Phytopathology*, 92, 314-320.
- 876 Le Cam, B., Sargent, D., Gouzy, J., Amselem, J., Bellanger, M. N., Bouchez, O., ... Lemaire,  
877 C. (2019). Population genome sequencing of the scab fungal species *Venturia inaequalis*,  
878 *Venturia pirina*, *Venturia aucupariae* and *Venturia asperata*. *G3: Genes, Genomes, Genetics*,  
879 9(8), 2405-2414. doi: 10.1534/g3.119.400047
- 880 Le Gac, M. L., & Giraud, T. (2008). Existence of a pattern of reproductive character  
881 displacement in Homobasidiomycota but not in Ascomycota. *Journal of evolutionary biology*,  
882 21(3), 761-772. doi: 10.1111/j.1420-9101.2008.01511.x
- 883 Lê Van, A., Gladieux, P., Lemaire, C., Cornille, A., Giraud, T., Durel, C. E., ... Le Cam, B.  
884 (2012). Evolution of pathogenicity traits in the apple scab fungal pathogen in response to the  
885 domestication of its host. *Evolutionary applications*, 5(7), 694-704. doi: 10.1111/j.1752-  
886 4571.2012.00246.x
- 887 Lemaire, C., De Gracia, M., Leroy, T., Michalecka, M., Lindhard-Pedersen, H., Guerin, F., ...  
888 Le Cam, B. (2016). Emergence of new virulent populations of apple scab from

- 889 nonagricultural disease reservoirs. *New Phytologist*, 209(3), 1220-1229. doi:  
890 10.1111/nph.13658
- 891 Leroy, T., Caffier, V., Celton, J. M., Anger, N., Durel, C. E., Lemaire, C., & Le Cam, B.  
892 (2016). When virulence originates from nonagricultural hosts: evolutionary and  
893 epidemiological consequences of introgressions following secondary contacts in *Venturia*  
894 *inaequalis*. *New Phytologist*, 210(4), 1443-1452. doi: 10.1111/nph.13873
- 895 Leroy, T., Lemaire, C., Dunemann, F., & Le Cam, B. (2013). The genetic structure of a  
896 *Venturia inaequalis* population in a heterogeneous host population composed of different  
897 *Malus* species. *BMC evolutionary biology*, 13(1), 64. doi: 10.1186/1471-2148-13-64
- 898 Lin, X., Litvintseva, A. P., Nielsen, K., Patel, S., Floyd, A., Mitchell, T. G., & Heitman, J.  
899 (2007).  $\alpha$ AD $\alpha$  hybrids of *Cryptococcus neoformans*: evidence of same-sex mating in nature  
900 and hybrid fitness. *PLoS Genetics*, 3(10), e186. doi: 10.1371/journal.pgen.0030186
- 901 Liu, B. H., Cheng, L., Ma, F. W., Liang, D., & Zou, Y. J. (2012). Influence of rootstock on  
902 drought response in young 'Gala Gala' apple (*Malus domestica* Borkh.) trees. *Journal of the*  
903 *Science of Food and Agriculture*, 92(12), 2421-2427. doi: 10.1002/jsfa.5647
- 904 MacHardy, W. E. (1996). *Apple scab: biology, epidemiology, and management*. American  
905 Phytopathological Society (APS Press).
- 906 Mantel, N. (1967). The detection of disease clustering and a generalized regression approach.  
907 *Cancer Research* 27, 209-20.
- 908 Newcombe, G., Stirling, B., McDonald, S., & Bradshaw, H. D. (2000). *Melampsora*  
909 *columbiana*, a natural hybrid of *M. medusae* and *M. occidentalis*. *Mycological Research*,  
910 104(3), 261-274. doi: 10.1017/S0953756299001665
- 911 Nikiforova, S. V., Cavalieri, D., Velasco, R., & Goremykin, V. (2013). Phylogenetic analysis  
912 of 47 chloroplast genomes clarifies the contribution of wild species to the domesticated apple  
913 maternal line. *Molecular Biology and Evolution*, 30(8), 1751-1760. doi:  
914 10.1093/molbev/mst092
- 915 Omasheva, M. Y., Flachowsky, H., Ryabushkina, N. A., Pozharskiy, A. S., Galiakparov, N.  
916 N., & Hanke, M. V. (2017). To what extent do wild apples in Kazakhstan retain their genetic  
917 integrity? *Tree genetics & genomes*, 13(3), 52. doi: 10.1007/s11295-017-1134-z
- 918 Paradis, E. & Schliep, K. (2019). ape 5.0: an environment for modern phylogenetics and  
919 evolutionary analyses in R, *Bioinformatics*, 35(3), 526-528.  
920 <https://doi.org/10.1093/bioinformatics/bty633>
- 921 Raffaele, S., Kamoun, S. (2012). Genome evolution in filamentous plant pathogens: why  
922 bigger can be better. *Nature Reviews Microbiology* 10, 417-430. doi: 10.1038/nrmicro2790
- 923 R Core Team (2018). R: A language and environment for statistical computing. R Foundation  
924 for Statistical Computing, Vienna. URL: <http://www.R-project.org/>
- 925 Reim, S., Proft, A., Heinz, S., Lochschmidt, F., Höfer, M., Tröber, U., & Wolf, H. (2017).  
926 Pollen movement in a *Malus sylvestris* population and conclusions for conservation measures.  
927 *Plant Genetic Resources*, 15(1), 12-20. doi:10.1017/S1479262115000301

- 928 Rhymer, J. M., & Simberloff, D. (1996). Extinction by hybridization and introgression.  
929 *Annual Review of Ecology and Systematics*, 27(1), 83-109. doi:  
930 10.1146/annurev.ecolsys.27.1.83
- 931 Rousset, F. (2008). Genepop'007: a complete reimplementation of the genepop software for  
932 Windows and Linux. *Molecular Ecology Resources*, 8, 103-106. doi:10.1111/j.1471-  
933 8286.2007.01931.x
- 934 Saleh, D., Milazzo, J., Adreit, H., Fournier, E., & Tharreau, D. (2014). South-East Asia is the  
935 center of origin, diversity and dispersion of the rice blast fungus, *Magnaporthe oryzae*. *New*  
936 *Phytologist*, 201(4), 1440-1456. doi: 10.1111/nph.12627
- 937 Spotts, R. A., & Ferree, D.C. (1979). Photosynthesis, transpiration, and water potential of  
938 apple leaves infected by *Venturia inaequalis*. *Phytopathology*, 69(7), 717-719. doi:  
939 10.1094/Phyto-69-717
- 940 Stukenbrock, E. H., Christiansen, F. B., Hansen, T. T., Dutheil, J. Y., & Schierup, M. H.  
941 (2012). Fusion of two divergent fungal individuals led to the recent emergence of a unique  
942 widespread pathogen species. *Proceedings of the National Academy of Sciences*, 109(27),  
943 10954-10959. doi: 10.1073/pnas.1201403109
- 944 Stukenbrock, E. H. (2016a). Hybridization speeds up the emergence and evolution of a new  
945 pathogen species. *Nature genetics*, 48(2), 113. doi: 10.1038/ng.3494
- 946 Stukenbrock, E. H. (2016b). The role of hybridization in the evolution and emergence of new  
947 fungal plant pathogens. *Phytopathology*, 106(2), 104-112. doi: 10.1094/PHYTO-08-15-0184-  
948 RVW
- 949 Tine, M., Kuhl, H., Gagnaire, P. A., Louro, B., Desmarais, E., Martins, R. S., ... Dieterich, R.  
950 (2014). European sea bass genome and its variation provide insights into adaptation to  
951 euryhalinity and speciation. *Nature communications*, 5, 5770. doi: 10.1038/ncomms6770
- 952 Todesco, M., Pascual, M. A., Owens, G. L., Ostevik, K. L., Moyers, B. T., Hübner, S., ...  
953 Rieseberg, L. H. (2016). Hybridization and extinction. *Evolutionary Applications*, 9(7), 892-  
954 908. doi: 10.1111/eva.12367
- 955 Vanden Broeck, A. V., Villar, M., Van Bockstaele, E., & Van Slycken, J. (2005). Natural  
956 hybridization between cultivated poplars and their wild relatives: evidence and consequences  
957 for native poplar populations. *Annals of Forest Science*, 62(7), 601-613. doi:  
958 10.1051/forest:2005072
- 959 Vavilov NI. (1931). The role of Central Asia in the origin of cultivated plants. *Bulletin of*  
960 *Applied Botany Genetics and Plant Breeding* 26(3), 3-44.
- 961 Velasco, R., Zharkikh, A., Affourtit, J., Dhingra, A., Cestaro, A., Kalyanaraman, A., ... Salvi,  
962 S. (2010). The genome of the domesticated apple (*Malus×domestica* Borkh.). *Nature*  
963 *genetics*, 42(10), 833. doi: 10.1038/ng.654
- 964 Wang, H., Vieira, F.G., Crawford, J. E., Chu, C. & Nielsen, R. (2017). Asian wild rice is a  
965 hybrid swarm with extensive gene flow and feralization from domesticated rice. *Genome*  
966 *Research*, 27(6),1029-1038. doi: 10.1101/gr.204800.116.

967 Wang, Y., Arenas, C. D., Stoebel, D. M., Flynn, K., Knapp, E., Dillon, M. M., ... Cooper, T.  
968 F. (2016). Benefit of transferred mutations is better predicted by the fitness of recipients than  
969 by their ecological or genetic relatedness. *Proceedings of the National Academy of Sciences*,  
970 *113*(18), 5047-5052. doi: 10.1073/pnas.1524988113

971 Weir, B. S., & Cockerham, C. C. 1984. Estimating F-statistics for the analysis of population  
972 structure. *Evolution* *38*: 1358-70.

973 Wolf, D. E., Takebayashi, N., & Rieseberg, L. H. (2001). Predicting the risk of extinction  
974 through hybridization. *Conservation Biology*, *15*(4), 1039-1053. doi: 10.1046/j.1523-  
975 1739.2001.0150041039.x

976 Zeder, M. A., Emshwiller, E., Smith, B. D., & Bradley, D. G. (2006). Documenting  
977 domestication: the intersection of genetics and archaeology. *Trends in Genetics*, *22*(3), 139-  
978 155. doi: 10.1016/j.tig.2006.01.007

979 Zohary, D., & Hopf, M. (2000). *Domestication of plants in the Old World: the origin and*  
980 *spread of cultivated plants in West Asia, Europe, and the Nile Valley*. Oxford University  
981 Press, New York.

982

983

#### 984 **Data accessibility**

985 All data will be archived and available on the following link, doi: 10.5281/zenodo.3565732

986

987

#### 988 **Author Contributions**

989 AF, EG, TG and CL wrote the manuscript with inputs from BLC, VC, JS and LD. Sampling  
990 in Kazakhstan was performed by CL and BLC. Apple microsatellite genotyping was  
991 performed by AF. Apple scab SNP design and genotyping was performed by MDG, MS and  
992 CL. SNP mapping and calling was performed by LD and JS. EG, MNB, PE and VC managed  
993 *in vitro* cultures of *Venturia inaequalis* and pathology assays. AF, EG and CL performed  
994 population genetics and statistical analyses. CL, BLC and TG conceived the project and  
995 obtained financial support.

996

997

998

999

1000

1001



1002

1003

1004

1005 **Tables**

1006

1007 **Table 1:** Comparison of four alternative demographic models of divergence between the  
 1008 reference wild-type and agricultural-type populations of *Venturia inaequalis* using  $\partial a \partial i$  on the  
 1009 SNP dataset.

| Model     | $k$      | logL          | AIC                | Model Comparison                      | $N_{\text{Wild}}$ | $N_{\text{Agri}}$ | $M_{\text{WA}}$ | $M_{\text{AW}}$ | $T_{\text{S}}$ | $T_{\text{AM}}$       | $T_{\text{SC}}$ |
|-----------|----------|---------------|--------------------|---------------------------------------|-------------------|-------------------|-----------------|-----------------|----------------|-----------------------|-----------------|
| SI        | 3        | -1197.8       | 2403.587014        | -                                     | 0.094             | 1.360             | -               | -               | 0.092          | -                     | -               |
| IM        | 5        | -981.8        | 1975.638252        | SI***                                 | 0.139             | 0.898             | 1.259           | 1.131           | 0.460          | -                     | -               |
| AM        | 6        | -981.8        | 1977.698045        | SI***, IM <sup>NS</sup>               | 0.139             | 0.892             | 1.270           | 1.140           | 0.460          | $1.09 \times 10^{-9}$ | -               |
| <b>SC</b> | <b>6</b> | <b>-928.6</b> | <b>1871.313317</b> | <b>SI***, IM***, AM<sup>+++</sup></b> | <b>0.163</b>      | <b>0.991</b>      | <b>1.355</b>    | <b>4.389</b>    | <b>0.227</b>   | -                     | <b>0.006</b>    |

1010

1011 SI, strict isolation model; IM, isolation with migration model; AM, ancient migration model;  
 1012 SC, secondary contact model;  $k$ , parameter numbers; logL, log-likelihood; AIC, Akaike  
 1013 Information Criterion;  $N_{\text{Wild}}$ , effective sizes of wild-type lineage;  $N_{\text{Agri}}$ , effective sizes of  
 1014 agricultural-type lineage;  $M_{\text{WA}}$ , migration rates from wild to agricultural-type lineage;  $M_{\text{AW}}$ ,  
 1015 migration rates from agricultural-type to wild-type lineage;  $T_{\text{S}}$ , time of split;  $T_{\text{AM}}$ , duration  
 1016 time since ancient migration;  $T_{\text{SC}}$ , duration time since secondary contact.

1017 The best supported model (SC) is indicated in bold. Model comparisons within and between  
 1018 classes of models are shown. Nested models were compared using likelihood ratio tests, with  
 1019 subscripts indicating significance levels (abbreviated \*\*\* $P < 0.001$ ; \*\* $P < 0.01$ ; \* $P < 0.05$ , NS  
 1020 non-significant). Non-nested models were compared using AIC with relative likelihood of  
 1021 each model compared to the best model  $L(\text{Mi}|\text{Mbest}) = \exp((\text{AICmin} - \text{AIC}_i)/2)$  (abbreviated  
 1022 +++ $L(\text{Mi}|\text{Mbest}) < 0.001$ ; ++ $L(\text{Mi}|\text{Mbest}) < 0.01$ ; + $L(\text{Mi}|\text{Mbest}) < 0.05$ ,  $L(\text{Mi}|\text{Mbest}) > 0.05$  :  
 1023 AIC difference shown).

1024

1025

1026

## 1027 **Figure legends**

1028 **Figure 1:** Summary of previous studies and questions addressed in the current study on *Malus*  
1029 apple trees (A) and on their fungal pathogen *Venturia inaequalis* (B). **A.** The divergence and  
1030 gene flow are shown at the top between the domesticated apple tree *M. domestica*, its initial  
1031 progenitor *M. sieversii* from Asia and its secondary contributor the European crabapple tree  
1032 *M. sylvestris* (Cornille et al. 2012). The distribution areas of the two wild apple trees are  
1033 shown at the bottom, indicating (1) the initial domestication in Asia (Cornille et al. 2012),  
1034 migration along the Silk Road (yellow full line) and (2) secondary gene flow between *M.*  
1035 *domestica* and *M. sylvestris* in Europe (Cornille et al. 2013; Feurtey et al. 2017), followed by  
1036 dispersion of modern cultivars worldwide (dashed yellow arrows). (3) A couple of previous  
1037 studies have investigated the consequence of the secondary contact between the domesticated  
1038 apple and its Asian progenitor in terms of gene flow from *M. domestica* to *M. sieversii*  
1039 (Cornille et al. 2012; 2012; Omasheva et al., 2017), and here we study the consequences of  
1040 planting orchards in forest. **B.** The divergence is shown at the top between the fungal  
1041 pathogen *V. inaequalis* populations and their distribution area at the bottom, with colored  
1042 trees symbolizing apple tree species and colored circles the fungal populations. (1) Gladieux  
1043 et al. (2010b) showed the existence of differentiated populations in Europe on *M. sylvestris*  
1044 and *M. domestica* (1A), in anthropic Central Asian areas on *M. sieversii* and *M. domestica*  
1045 (1B) and in the wild Central Asian forests on *M. sieversii* (1C). (2) Lemaire et al. (2016)  
1046 showed that the differentiated European *V. inaequalis* population on cultivated apples  
1047 carrying the Rvi6 resistance originated from *M. floribunda*. (3) Leroy et al. (2016)  
1048 investigated the existence of gene flow between populations infecting Rvi6 and non-Rvi6  
1049 apple trees in Europe. (4) The present study investigates the occurrence of gene flow among  
1050 Central Asian pathogen populations, i.e., the population in anthropic Central Asian areas on  
1051 *M. sieversii* and *M. domestica* and the population in the wild Central Asian forests on *M.*  
1052 *sieversii*.

1053

1054 **Figure 2:** Genetic diversities and ancestry assignments for apple trees and *Venturia*  
1055 *inaequalis*. (A) Principal component analysis on genotypes of 240 apple trees (*Malus spp.*) for  
1056 28 microsatellite markers, with their ancestry assignment ( $P_{dom}$ ) to the cultivated apple tree *M.*  
1057 *domestica* indicated by color. The distribution of the  $P_{dom}$  index is shown in the inset at the top  
1058 left. (B) Principal component analysis on genotypes of 255 *V. inaequalis* strains for 181  
1059 SNPs, with their ancestry assignment ( $P_{agr}$ ) to the agricultural-type of *V. inaequalis* indicated  
1060 by color. The distribution of the  $P_{agr}$  index is shown in the inset at the top left.

1061

1062 **Figure 3:** Distribution of the samples of apple trees and their fungal pathogen *Venturia*  
1063 *inaequalis* in nine sites in the Tian Shan Mountains near Almaty (Kazakhstan). The black dot  
1064 on the upper left corner map represents the global sampling location. Proportions of wild  
1065 (blue), domesticated/agricultural (yellow) and hybrid (red) genotypes are shown for each  
1066 sampling site for *Malus* trees (upper row of pie charts) and for their scab fungal pathogen  
1067 (lower row of pie charts). The pie charts below the figure correspond to sampling sites in the  
1068 natural forest. The pie charts above the figure refer to a sampling location composed of two  
1069 sites, an orchard and the natural forest immediately surrounding it. Codes of the sampling

1070 locations: kot at Koturbulac; tag and tar at Talghar; lac, gec and esi (esi\_o for the orchard and  
1071 esi\_f for the surrounding forest) at Esik; tuk and tum at Turgen.

1072

1073 **Figure 4:** The proportion of *Malus domestica* ancestry in the apple tree (y axis) plotted  
1074 against the proportion of agricultural-type ancestry in *Venturia inaequalis* strains (x axis). A)  
1075 For each of the 249 host-pathogen pairs, two sampling sites are highlighted: the orchard  
1076 (esi\_o) in orange and the surrounding forest (esi\_f) in blue. B) For each of the 189 host-  
1077 pathogen pairs for which the genotype at the *V\_081690\_319* locus was available, the *V.*  
1078 *inaequalis* strains carrying the tyrosine (A) allele were colored in grey and the ones carrying  
1079 the stop codon (G) allele in red.

1080

1081 **Figure 5:** Results of pathogenicity experiments in controlled conditions consisting in artificial  
1082 inoculation of the fungus *Venturia inaequalis* (57 fungal strains; mean of three replicates per  
1083 strain, one genotype per apple species) on apple tree leaves (*Malus sieversii* and *M.*  
1084 *domestica*). Boxplots of the percentage of scabbed leaf area for wild-type, agricultural-type  
1085 and hybrid *V. inaequalis* strains of A) *M. domestica* at 21 days post inoculation (dpi) and B)  
1086 *M. sieversii* at 19 dpi. The box represents the lower and the upper quartiles. The thick  
1087 horizontal line represents the median. The whiskers represent the largest and lowest observed  
1088 values that fall within the distance of 1.5 times the interquartile range. The points represent  
1089 the mean values of the percentage of diseased leaf area for each strain across the three  
1090 replicates. Different letters indicate significant differences between populations ( $P < 0.05$ ;  
1091 Wilcoxon's rank sum tests).

1092

1093 **Figure 6:** Pictures illustrating the percentage of scabbed leaf area for the most virulent wild-  
1094 type, agricultural-type and hybrid *Venturia inaequalis* strains on A) *Malus domestica* at 21  
1095 days post inoculation (dpi) and B) *M. sieversii* at 19 dpi.

1096

1097 **Figure 7:** Demographic inference on the divergence between wild and agricultural types of  
1098 *Venturia inaequalis* in Kazakhstan. **A.** The four contrasted scenarios of divergence compared,  
1099 with either strict isolation (SI), isolation with continuous migration (IM), isolation with initial  
1100 migration (AM) and secondary contact (SC), with effective populations sizes of the ancestral  
1101 population ( $N_{ref}$ ) and of the two daughter populations ( $N_w$  and  $N_A$ ), the rate of gene flow in  
1102 the two directions ( $M_w$  and  $M_A$ ) and the time since the cessation of gene flow ( $T_{AM}$ ) or the  
1103 secondary contact ( $T_{SC}$ ). **B.** The joint allele-frequency spectrum (AFS) for the wild and  
1104 agricultural fungal populations, showing the count of derived allele. Each entry of the joint  
1105 AFS is colored by the number of SNPs in it, according to the scale shown. **C.** The secondary  
1106 contact (SC) model that obtained the best support and estimates of the parameters.

1107

1108

A

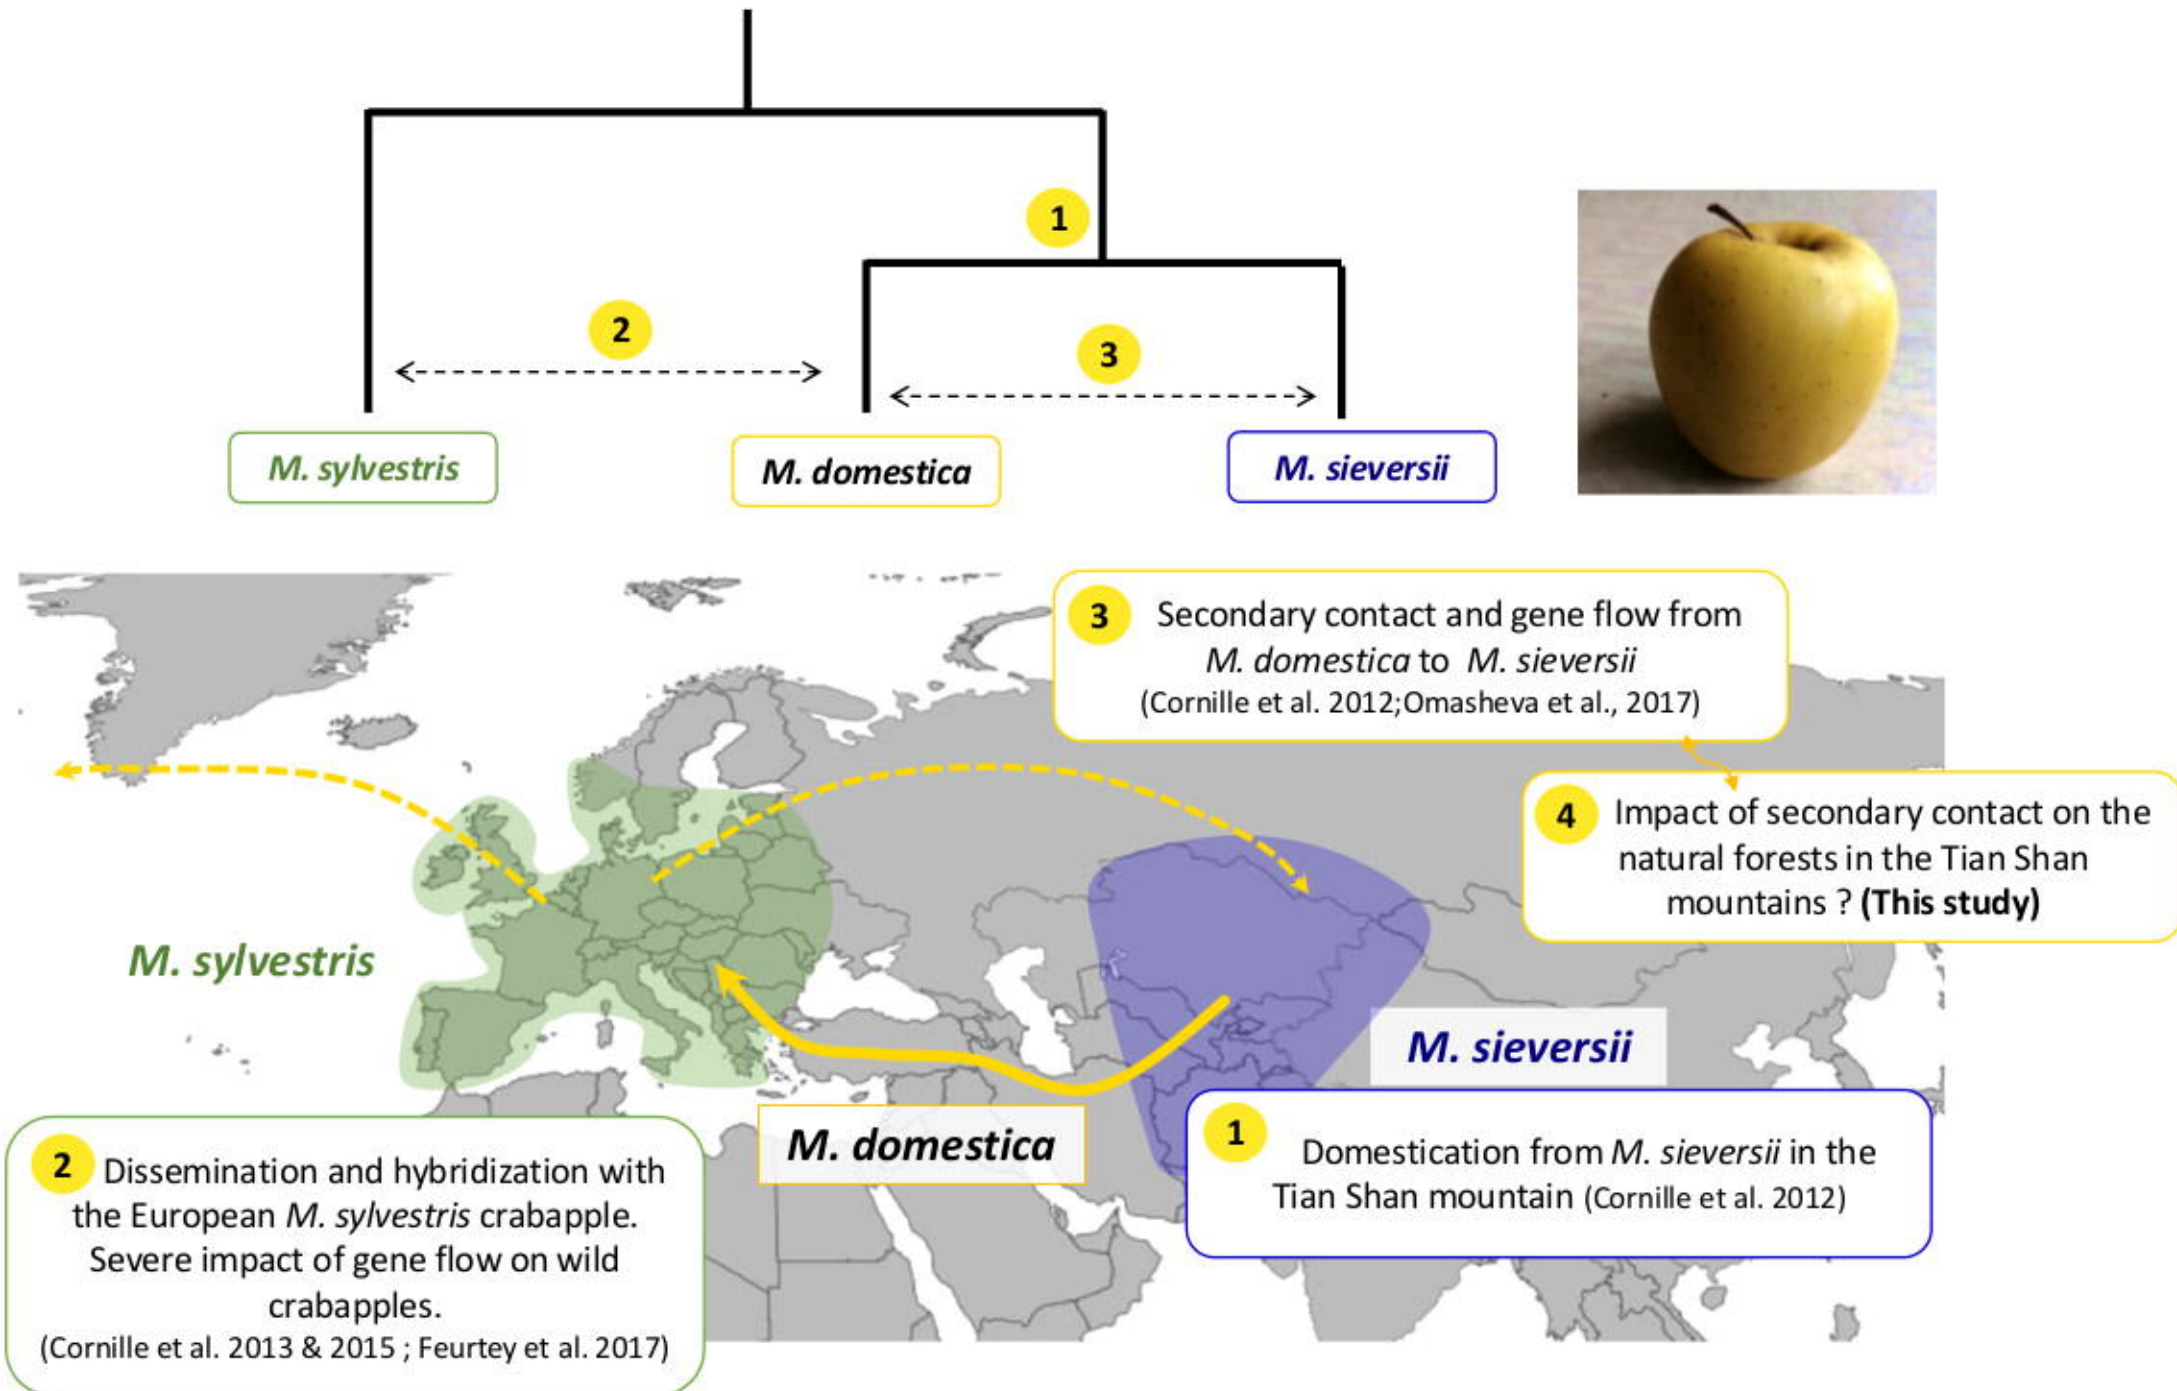

**B**

**2** The European *V. inaequalis* population on cultivated apples carrying the Rvi6 resistance originated from *M. floribunda* (Lemaire et al. 2016)

**1** Identification of 3 *V. inaequalis* populations (Gladieux et al 2010b):

- 1A in Europe
- 1B in anthropic Central Asian areas
- 1C in the wild Central Asian forests

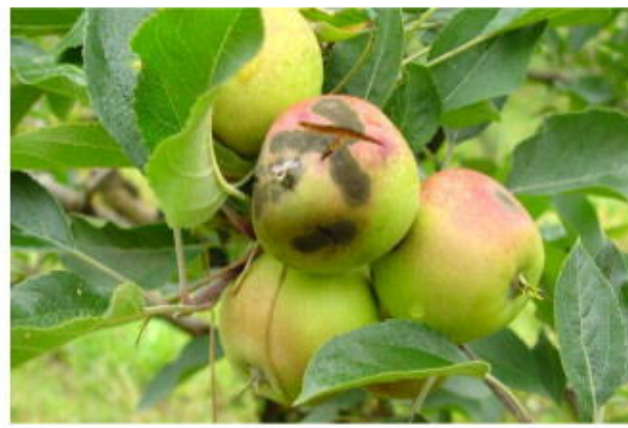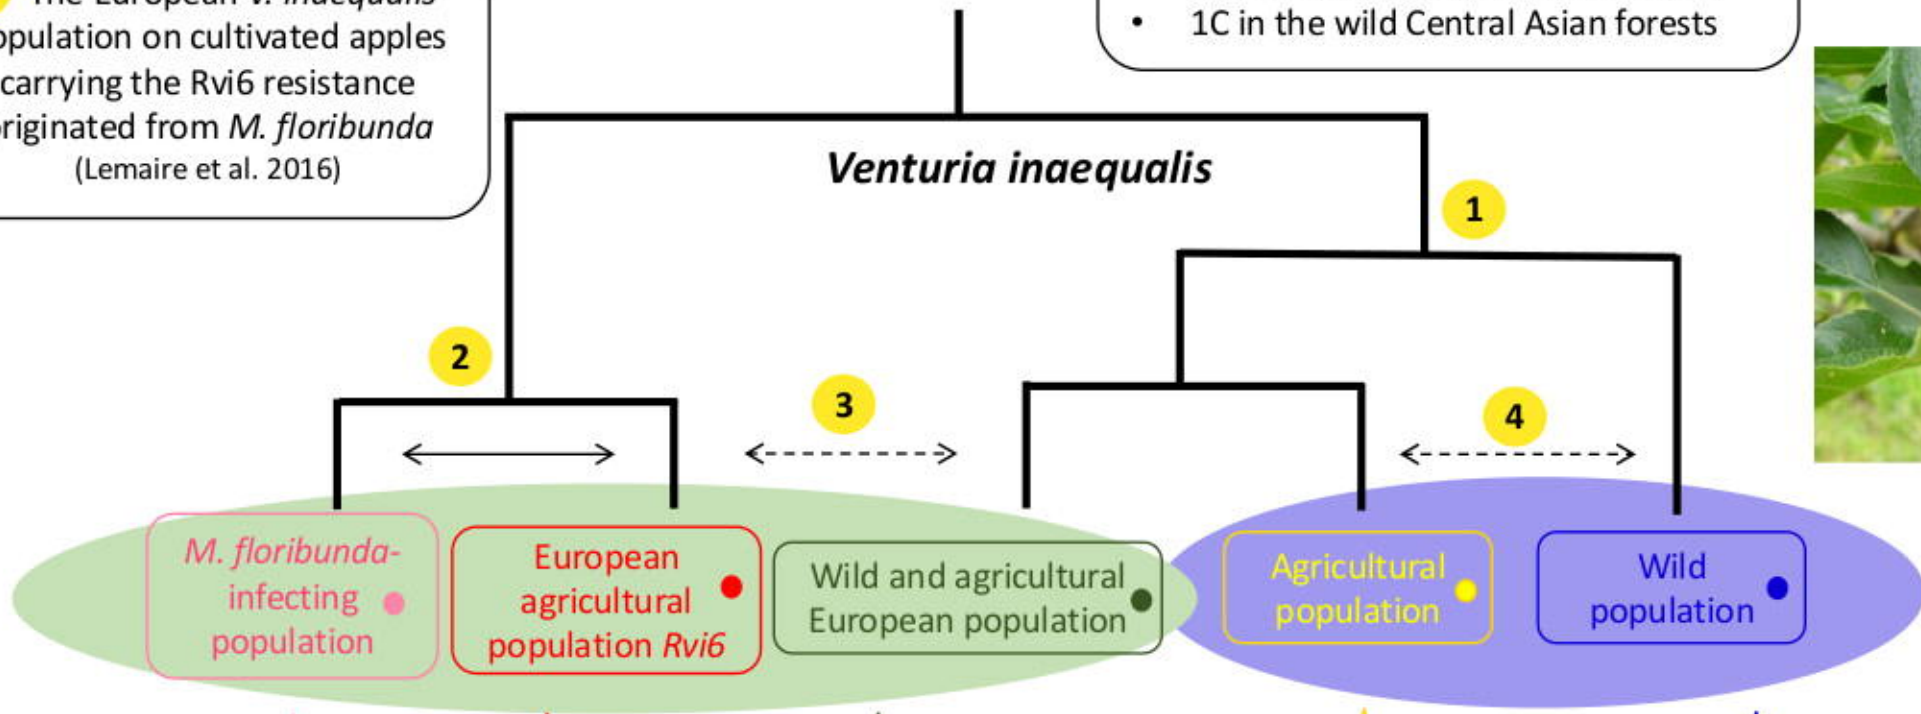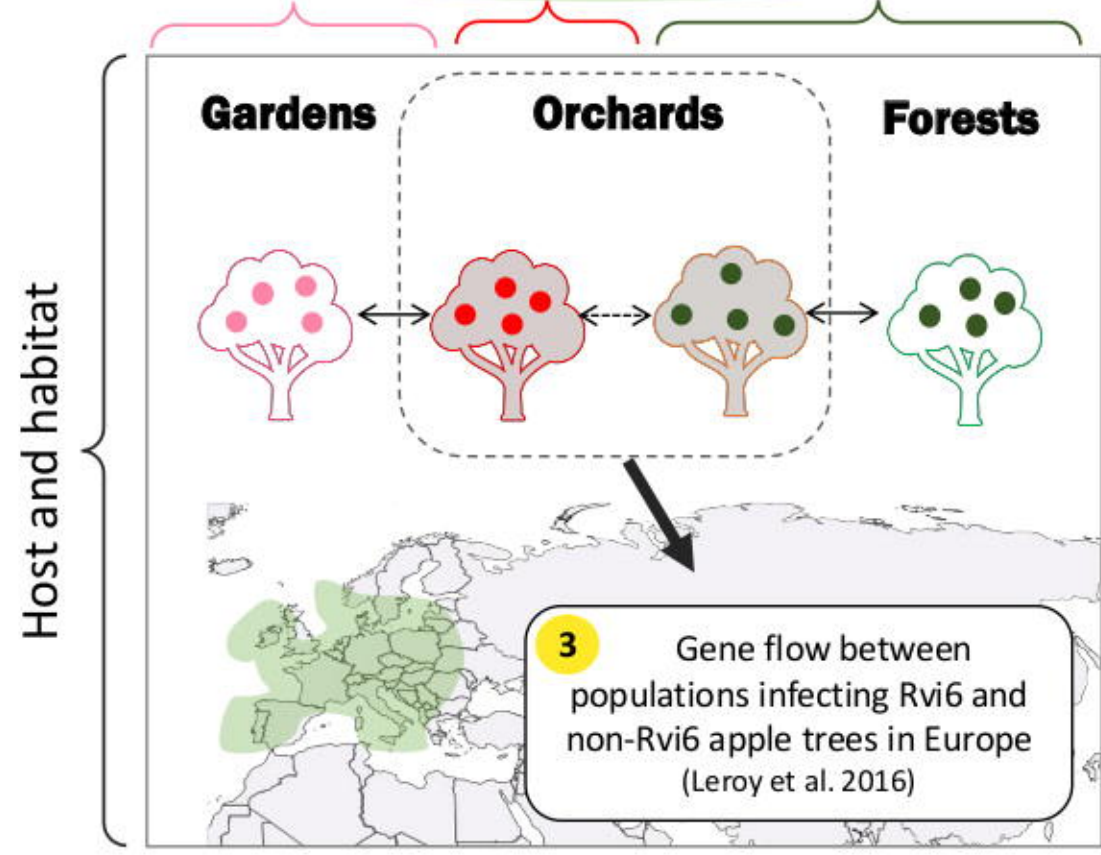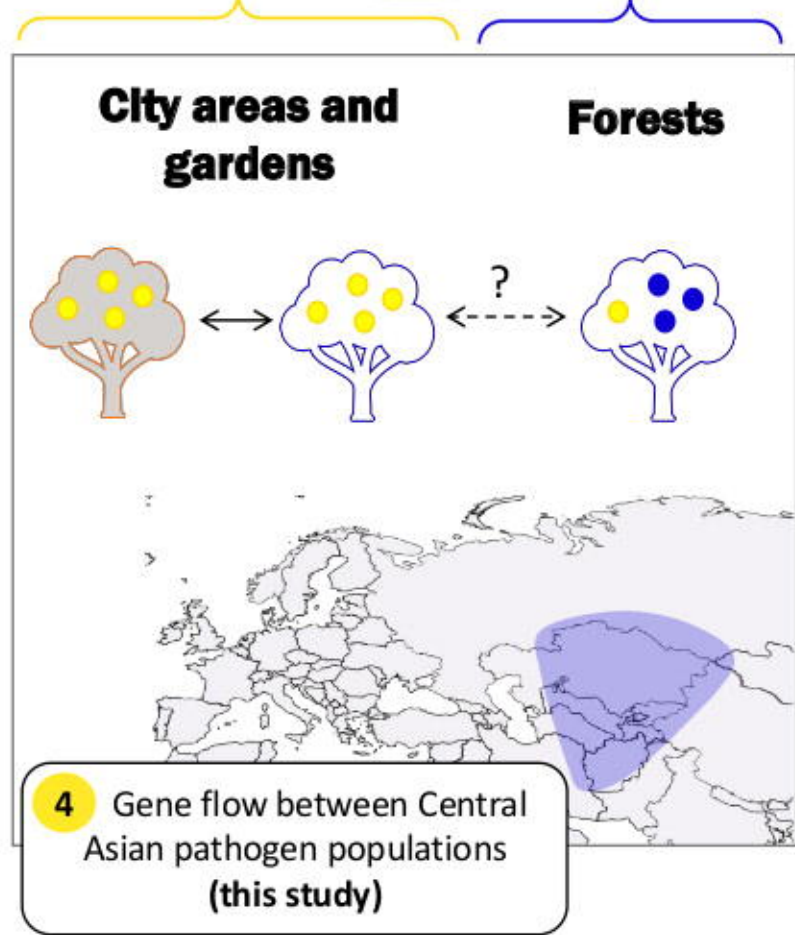

- Legend shapes:**
- *V. inaequalis*
  - 🌳 Wild apple tree
  - 🌳 Domesticated apple tree
- Legend host color:**
- 🌳 *M. domestica* with Rvi6
  - 🌳 *M. domestica* non-Rvi6
  - 🌳 *M. sylvestris*
  - 🌳 *M. sieversii*
  - 🌳 *M. floribunda*

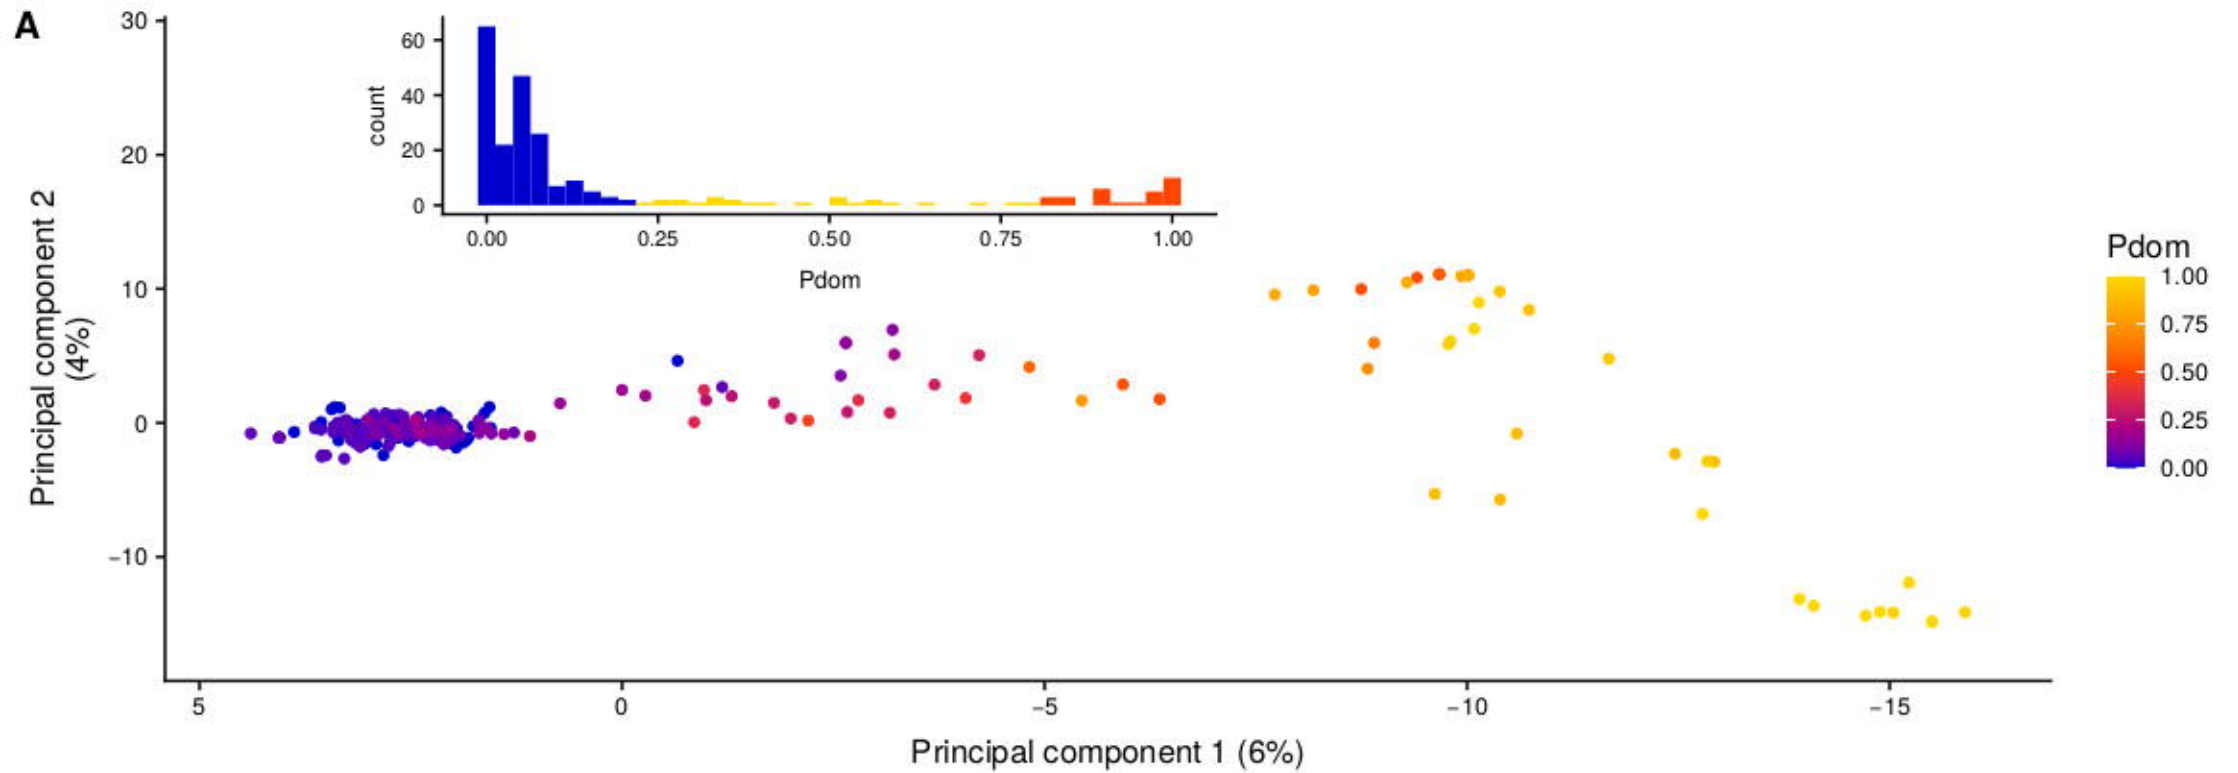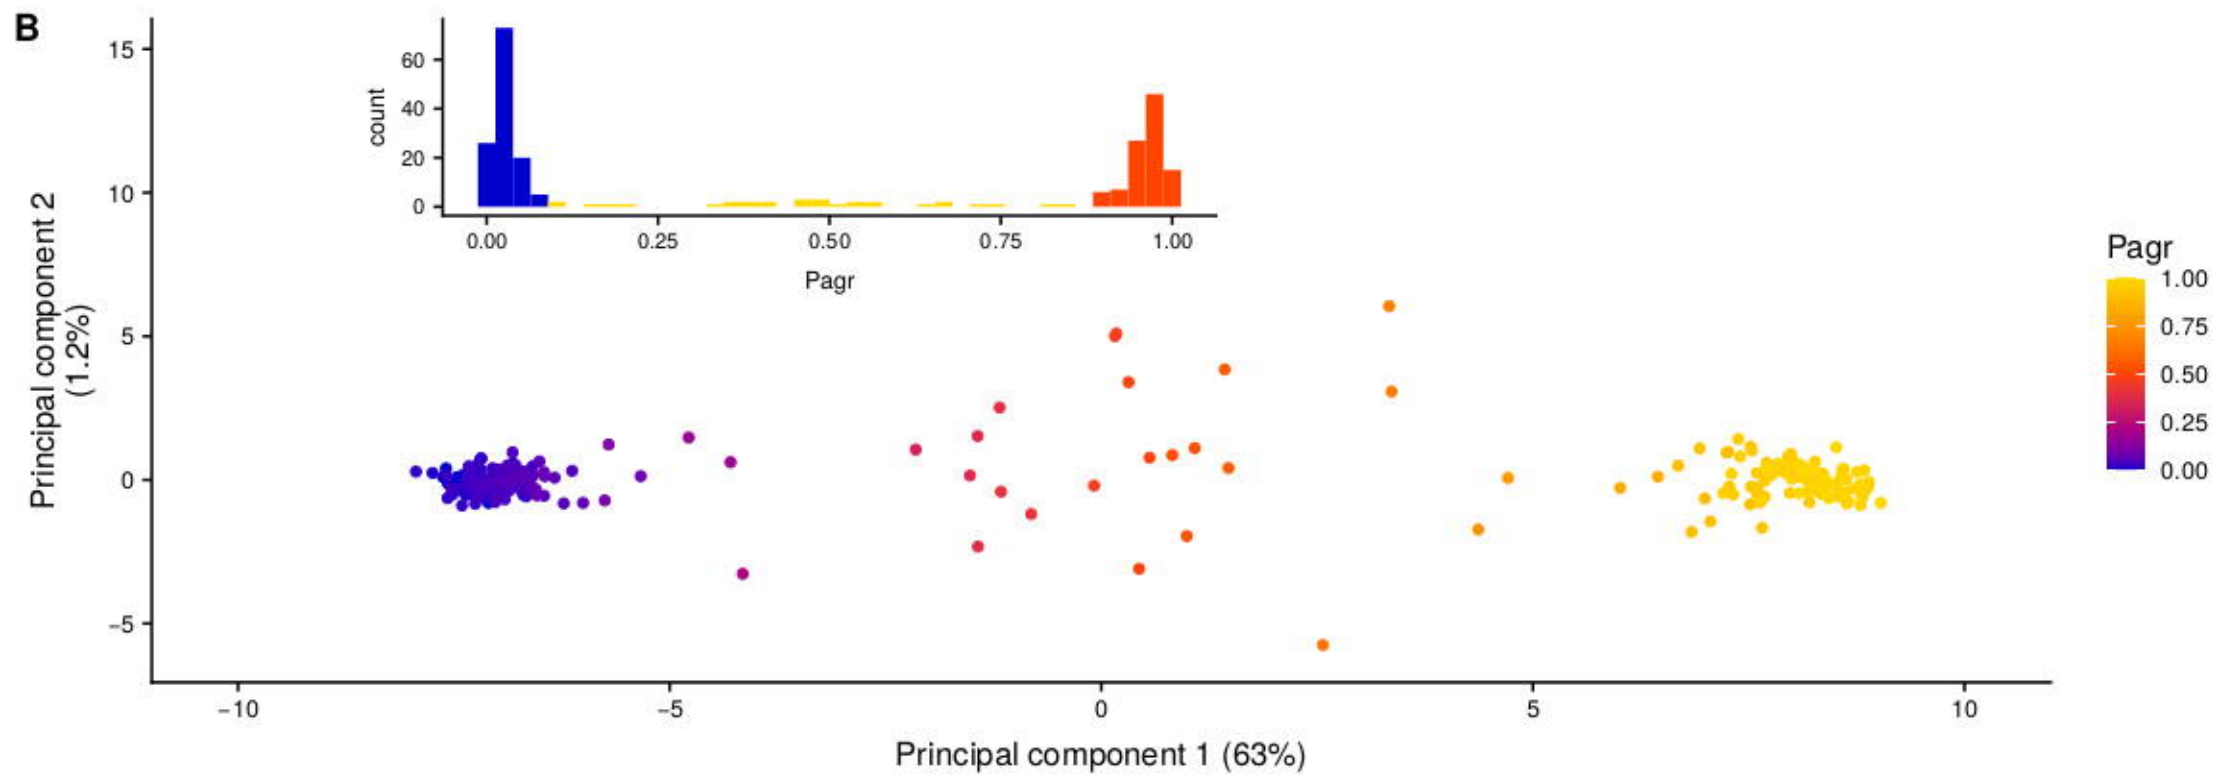

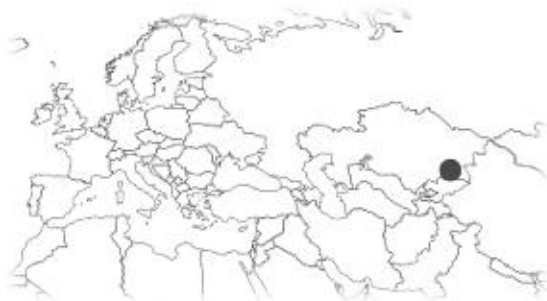

orchard surrounding forest

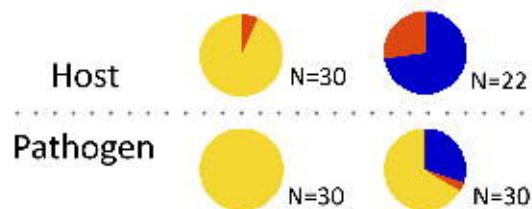

77.00

77.25

77.50

Longitude

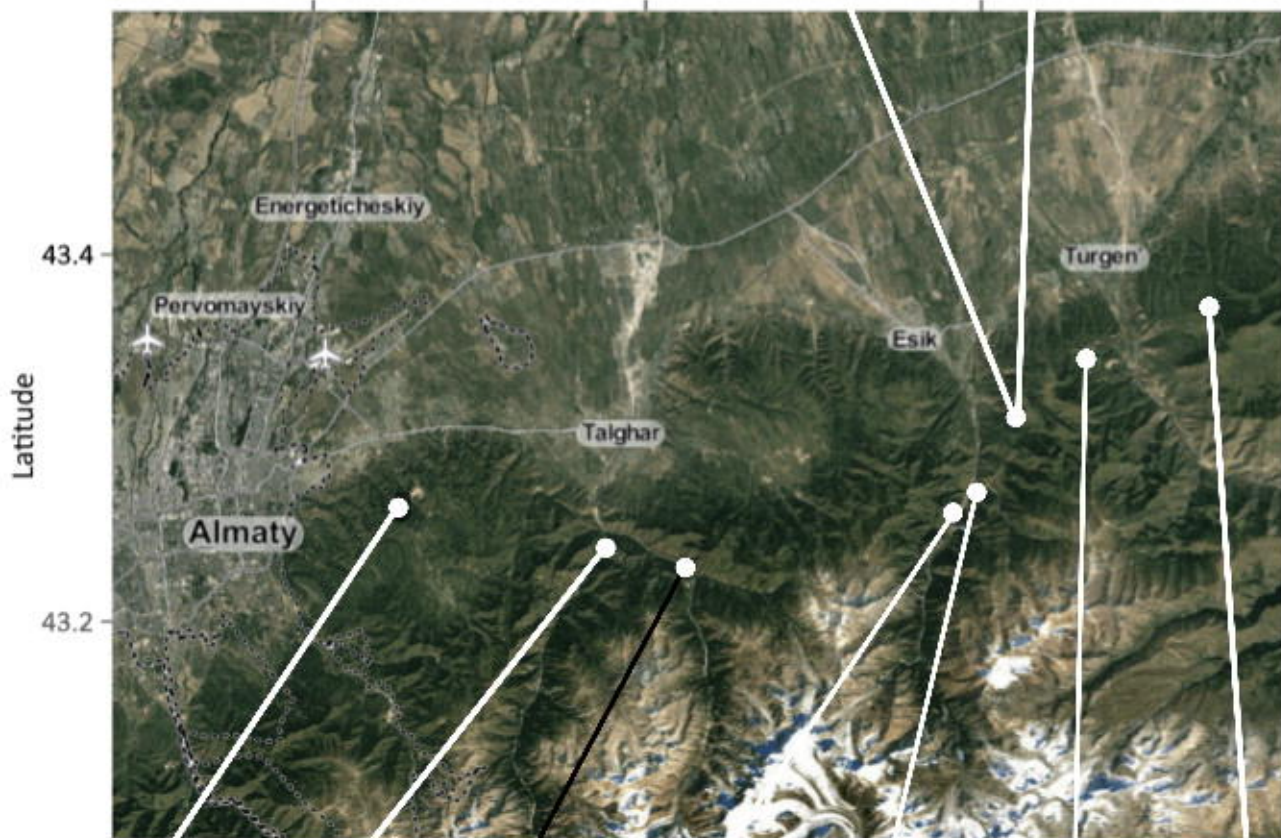

Host

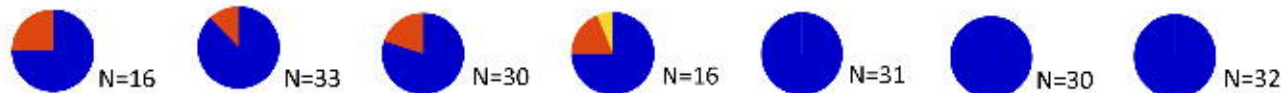

Pathogen

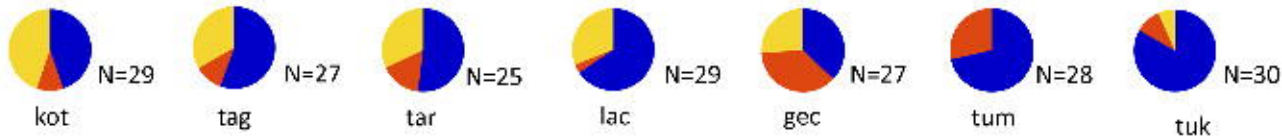



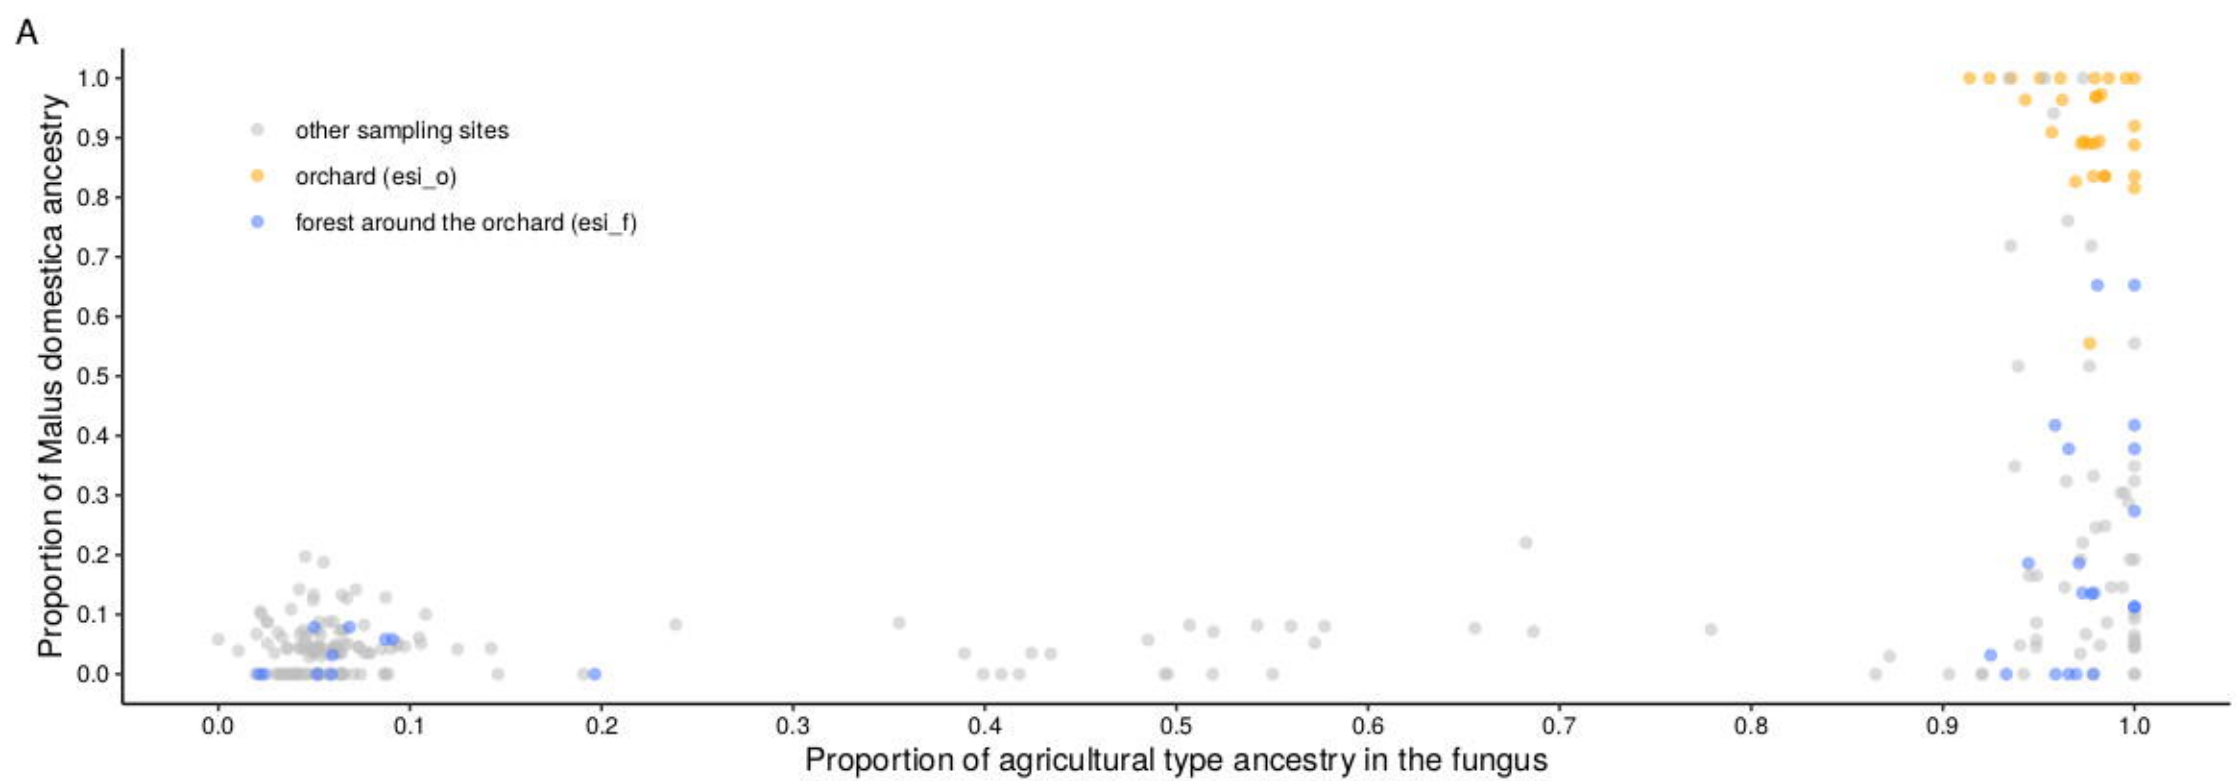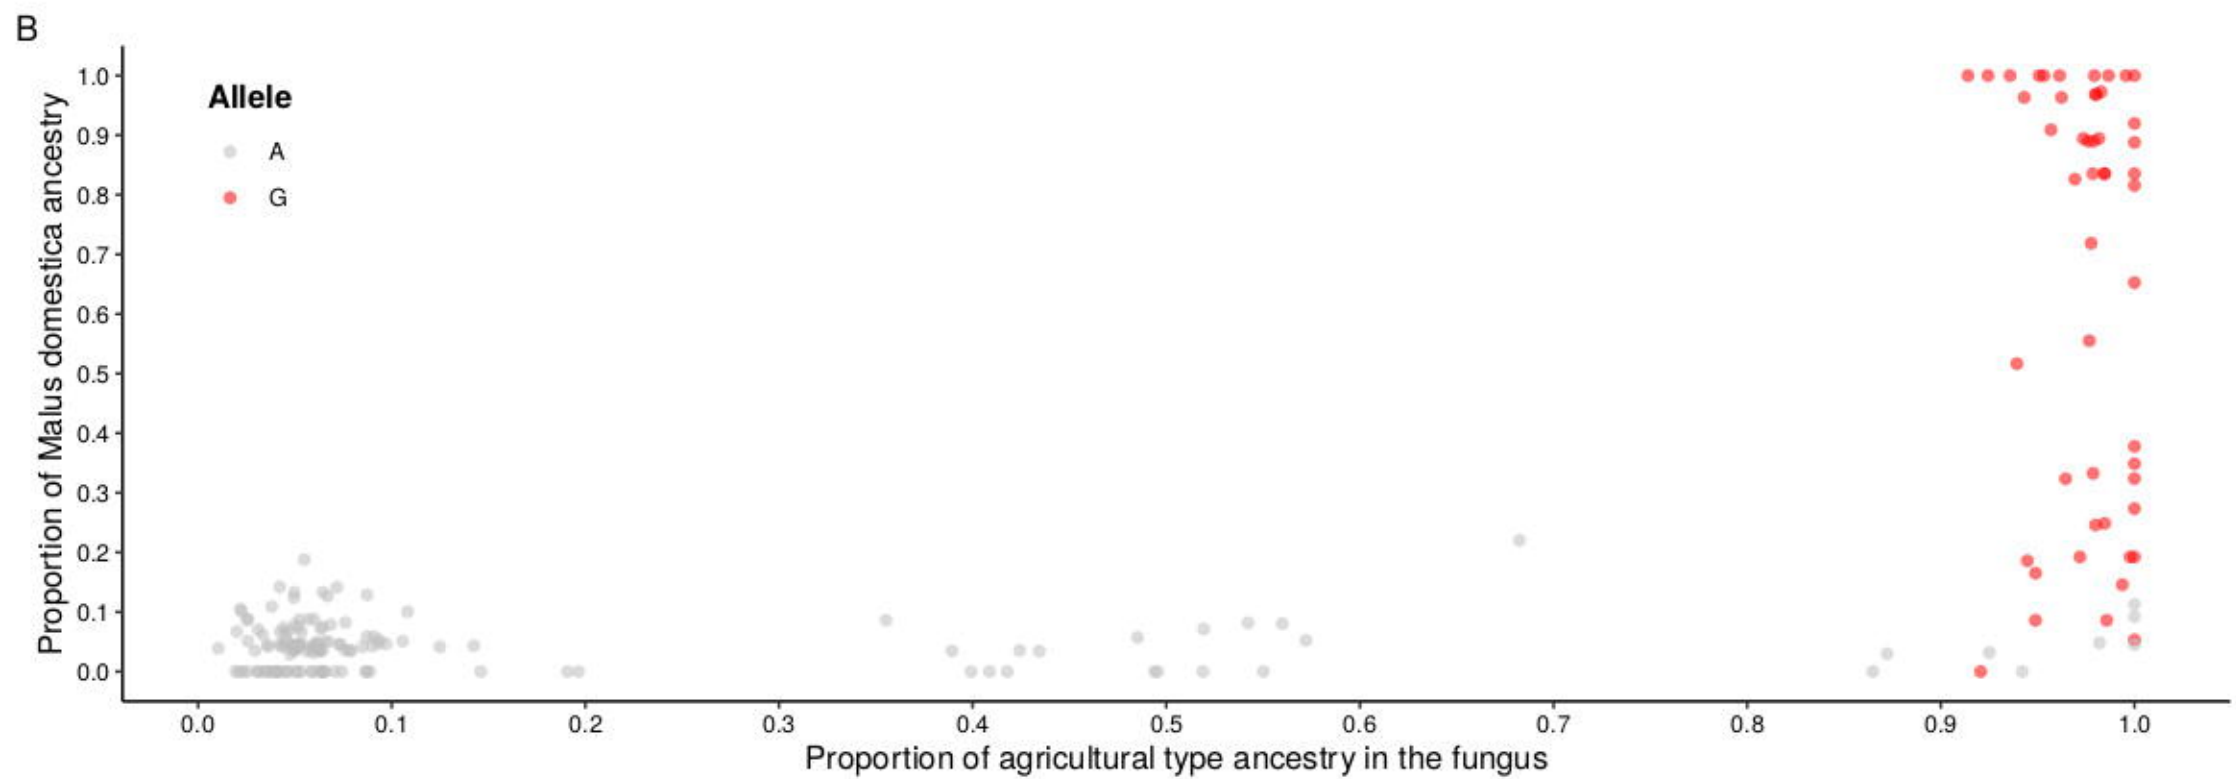

**A**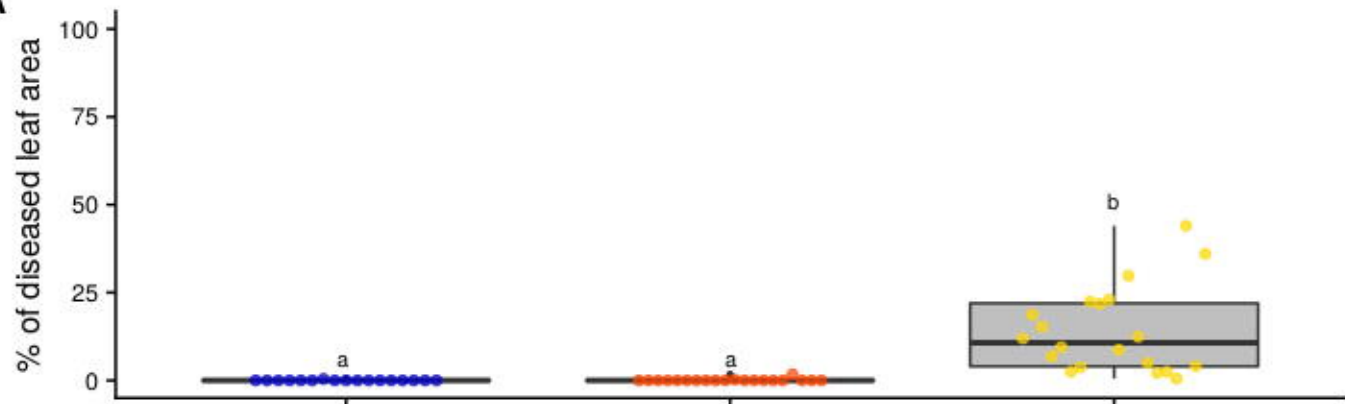**B**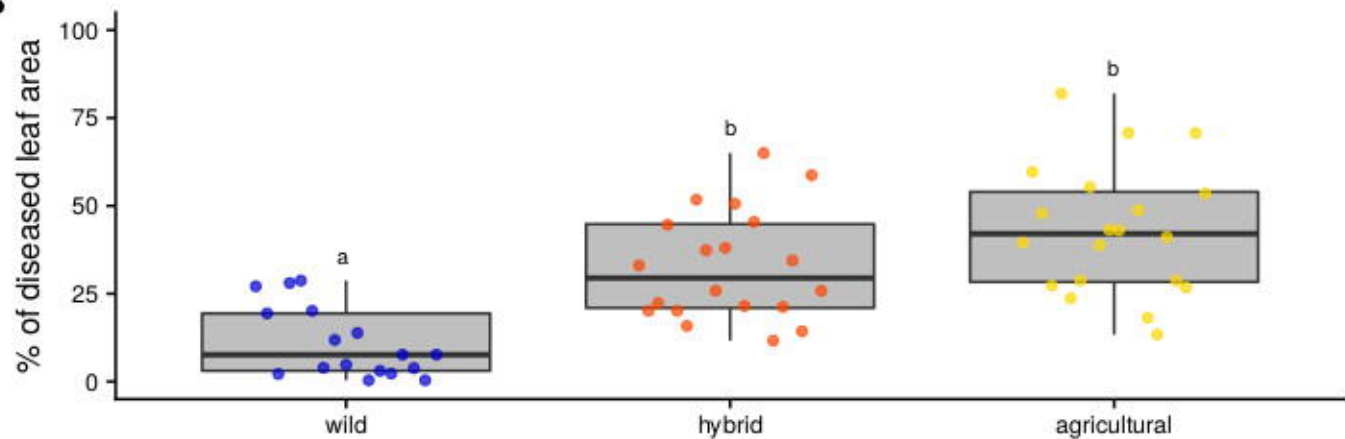

A

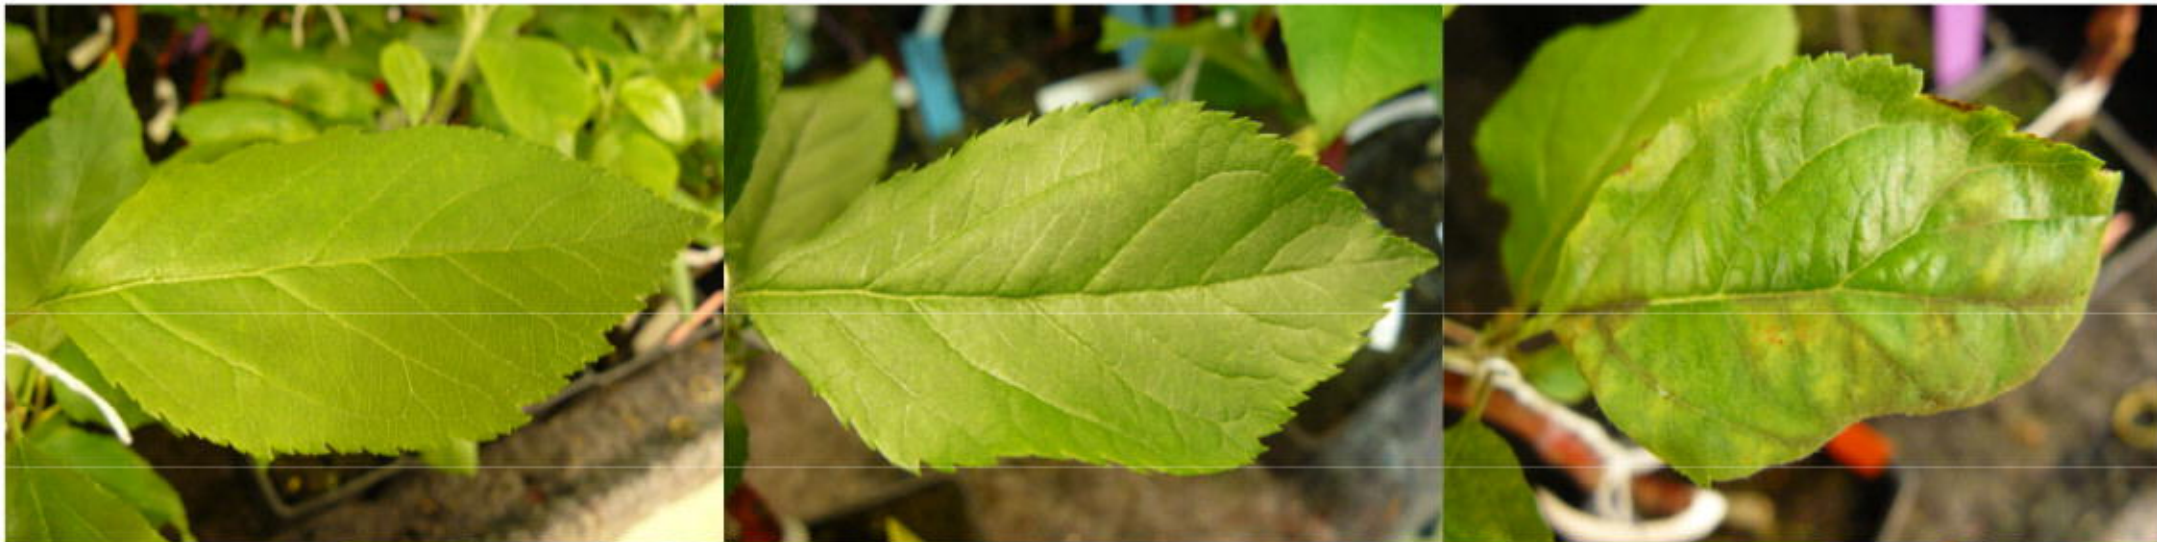

B

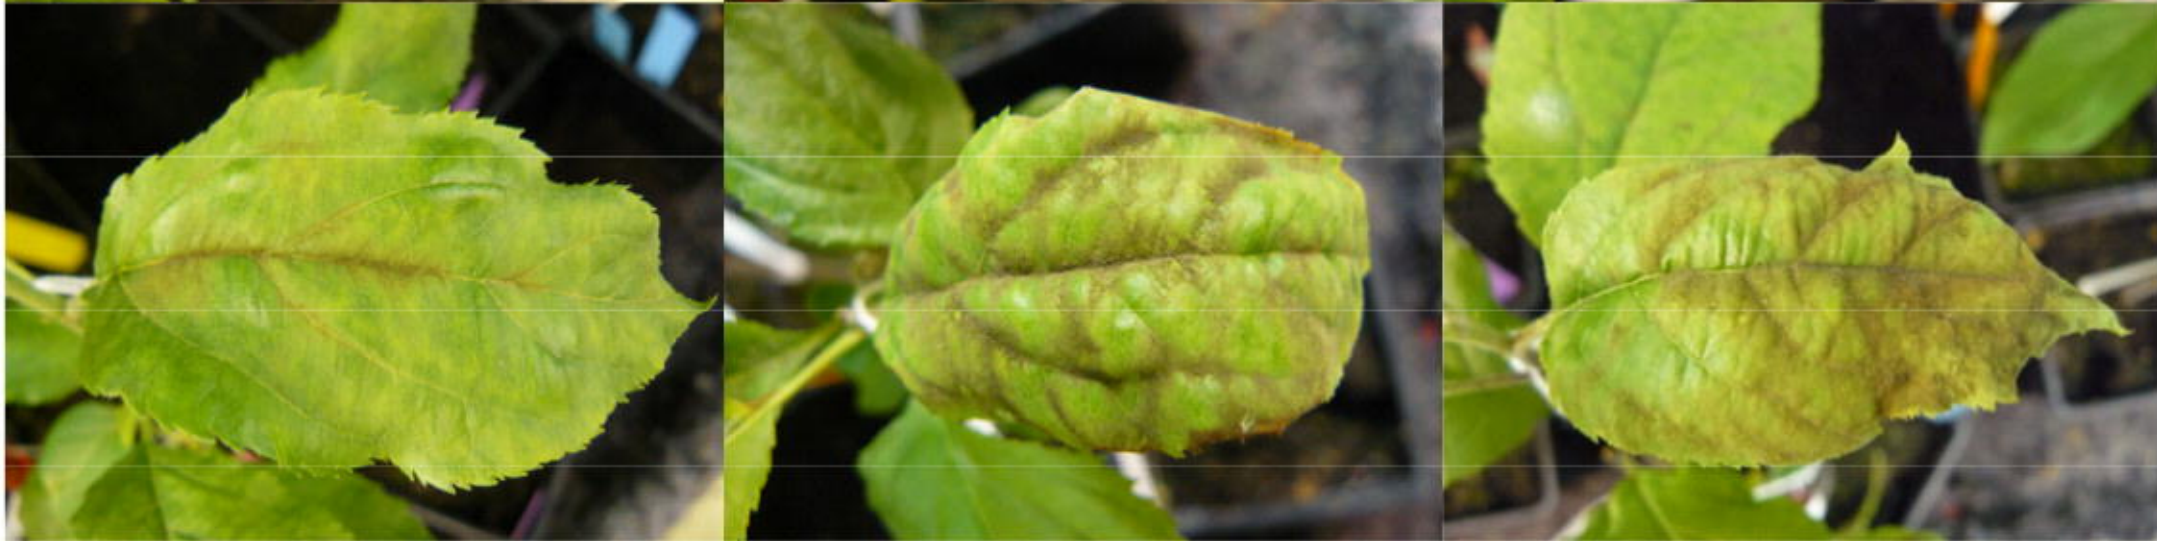

wild

hybrid

agricultural

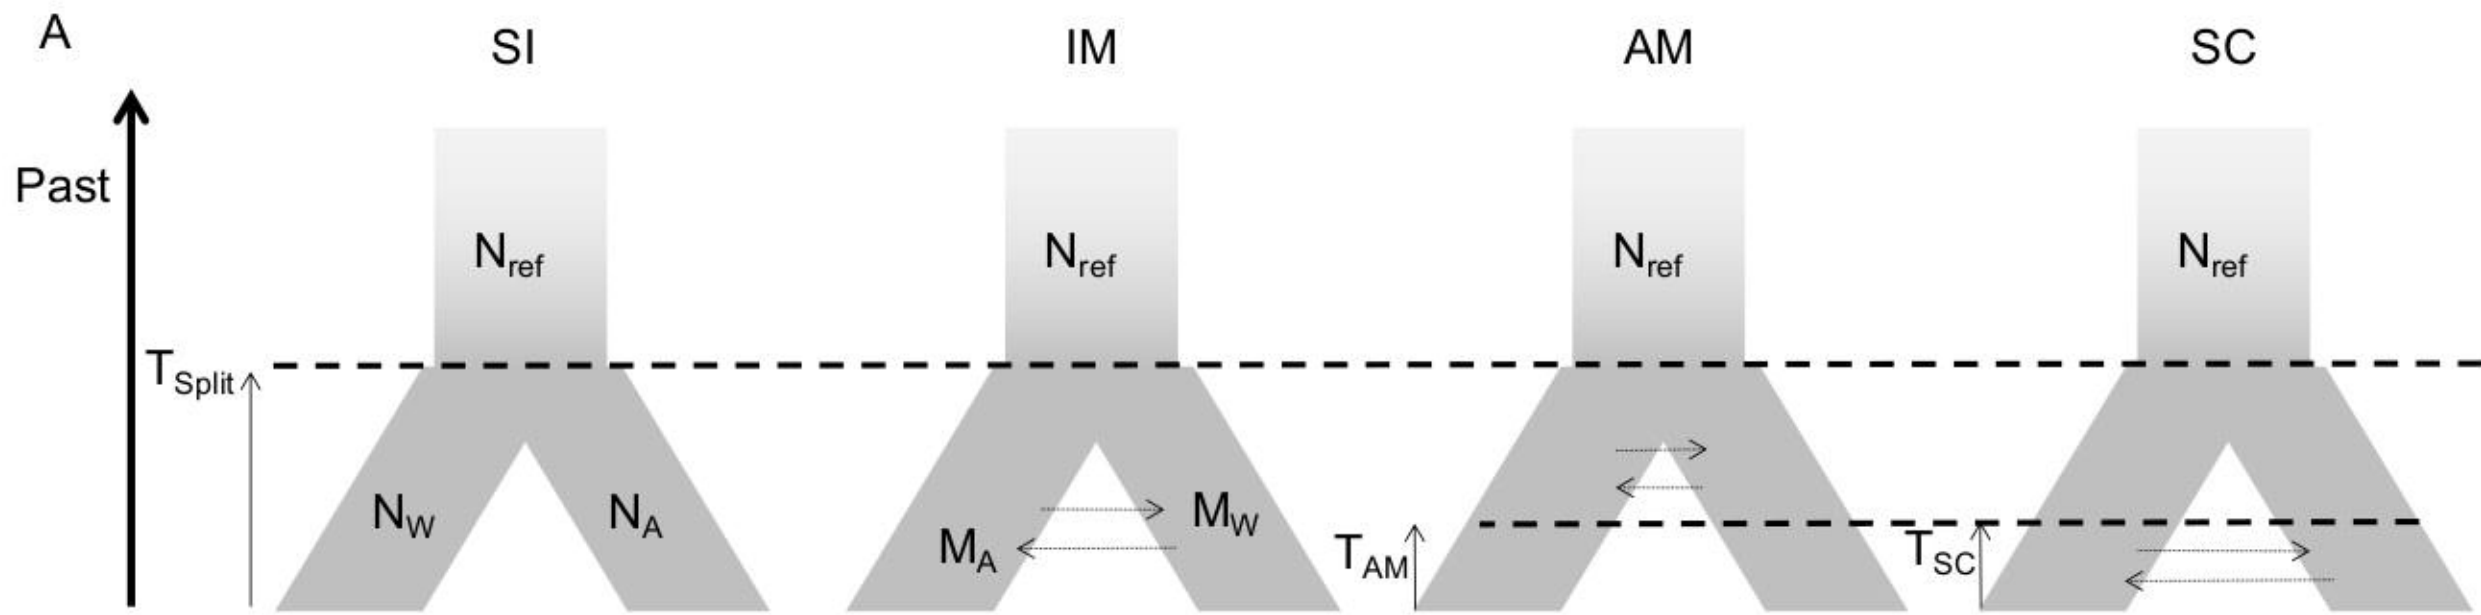

**B**

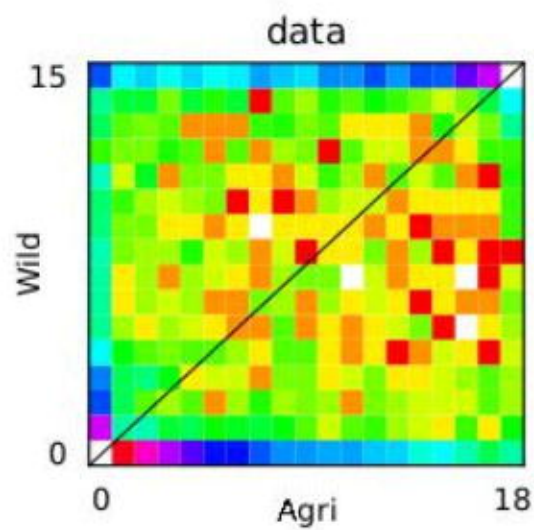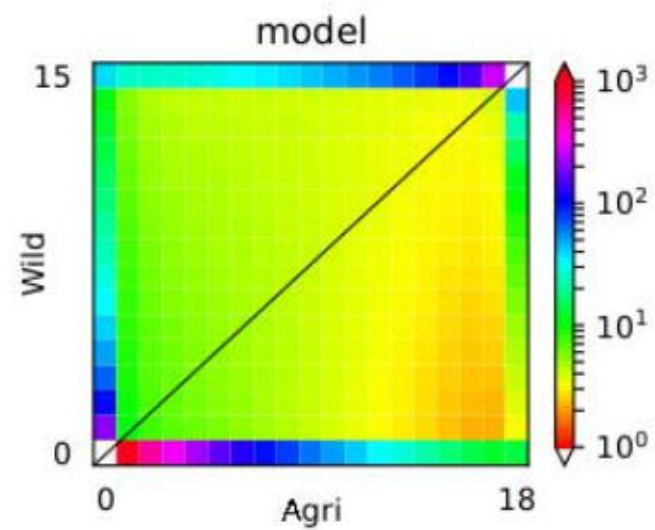

**C**

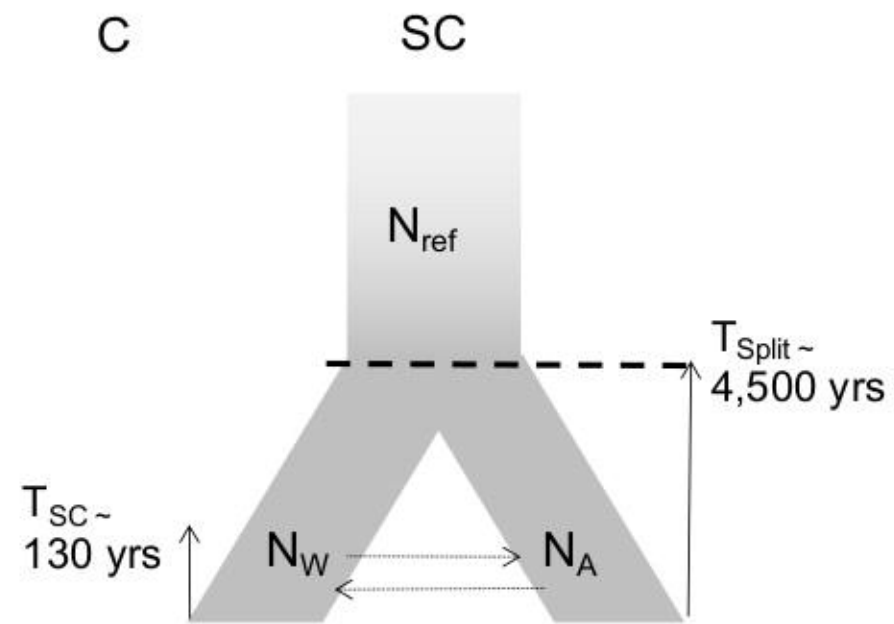

Source: https://www.biorxiv.org/content/biorxiv/early/2020/04/16/2020.04.15.042242.full.pdf
